# Supplementary material for: Single-step in situ synthesis of bimetallic catalysts via a gas-phase route: the case of PdZn–ZnO
Source: Royal Society of Chemistry journal article supplement (doi:10.1039/d4cy00807c), 2024-01-01

## Supporting Information

### Single-step in situ synthesis of bimetallic catalysts via gas-phase route: the case of PdZn-ZnO

Andrija Kokanović<sup>a,b</sup>, Dunja Pupavac<sup>c</sup>, Stephane Chenot<sup>b</sup>, Stephane Guilet<sup>b</sup>, Igor M. Opsenica<sup>c\*</sup>, Slavica Stankic<sup>b\*</sup>

a Innovative center, Faculty of Chemistry, Belgrade, Ltd., Studentski trg 16, 11158 Belgrade, Serbia

b Sorbonne Université, CNRS UMR 7588, Institut des NanoSciences de Paris INSP, 4 place Jussieu 75252 Paris cedex 05, France

c University of Belgrade – Faculty of Chemistry, PO Box 51, Studentski trg 16, 11158 Belgrade, Serbia

Corresponding Authors:

Igor M. Opsenica, E-mail: igorop@chem.bg.ac.rs

Slavica Stankic, E-mail: slavica.stankic@insp.jussieu.fr

| <b>Table of contents</b>                                         | <b>Page</b> |
|------------------------------------------------------------------|-------------|
| 1) Experimental Procedure and Characterization Data for Products | S2          |
| 2) Figures – TEM and XPS                                         | S7          |
| 3) References                                                    | S9          |
| 4) Copies of <sup>1</sup> H NMR spectra of products              | S10         |
| 5) Copies of GC-MS spectra of products                           | S18         |

## Experimental Procedure and Characterization Data for Products

### Materials and Methods

**General.** Dry-flash chromatography was performed on SiO<sub>2</sub> (0.018–0.032 mm). <sup>1</sup>H and <sup>13</sup>C NMR spectra were recorded on Bruker Ultrashield Avance III spectrometer (at 500 and 125 MHz, respectively) using CDCl<sub>3</sub> (unless stated otherwise) as the solvents. Chemical shifts are expressed in parts per million (ppm) on the (δ) scale. Chemical shifts were calibrated relative to those of the solvent. GC-MS spectra of the synthesized compounds were acquired on an Agilent Technologies 7890A apparatus equipped with a DB-5 MS column (30 m × 0.25 mm × 0.25 μm) or Agilent 19091N-113 column (30 m × 320 μm × 0.25 μm), a 5975C MSD and FID detector. The selected values are as follows: carrier gas was He (1.0 mL/min or 2.0 mL/min, depending on the column, respectively), temperature linearly increased from 40–315 °C (10 °C/min), injection volume: 1 μL, temperature: 250 °C, temperature (FID detector): 300 °C, and EI mass spectra range: m/z 40–550.

## General procedure for the reduction of nitroarenes

### 4-Aminobenzonitrile (**2a**)<sup>1</sup>

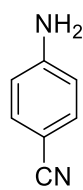

**2a**

To a round bottom cuvette equipped with a magnetic stirrer, 4-aminobenzonitrile **1a** (22.3 mg, 0.15 mmol), PdZn-ZnO (2.0 mg, 2.5 mol% Pd) and methanol (2.0 mL) were added. Hydrogen was introduced into the reaction mixture through a rubber balloon (1 atm H<sub>2</sub>) at room temperature, for 3 h. The reaction mixture was separated from the catalyst by filtering it through a thin layer of silica gel, and the layer was washed several times with methylene chloride. Solvents were removed under reduced pressure to obtain **2a** (17.7 mg, 99%) as a pale-yellow solid. <sup>1</sup>H NMR (500 MHz, CDCl<sub>3</sub>) δ = 7.39 (d, *J* = 8.8 Hz, 2H), 6.64 (d, *J* = 8.7 Hz, 2H), 4.19 (s, 2H). GC-MS: *m/z* = 118.1 [M]<sup>+</sup>.

### 4-Aminoacetophenone (**2b**)<sup>2</sup>

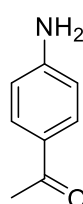

**2b**

Following the general procedure for the reduction of nitroarenes, reaction was performed with 4-nitroacetophenone **1b** (24.8 mg, 0.15 mmol), PdZn-ZnO (2.0 mg, 2.5 mol% Pd) and methanol (2.0 mL) for 8 h, to obtain **2b** (19.7 mg, 97%) as a pale-yellow solid. <sup>1</sup>H NMR (500 MHz, CDCl<sub>3</sub>) δ = 7.79 (dd, *J* = 8.6, 1.5 Hz, 2H), 6.63 (dd, *J* = 8.7, 1.2 Hz, 2H), 4.20 (s, 2H), 2.49 (s, 3H). GC-MS: *m/z* = 135.1 [M]<sup>+</sup>.

### Aniline (**2c**)<sup>3</sup>

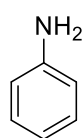

**2c**

Following the general procedure for the reduction of nitroarenes, reaction was performed with nitrobenzene **1c** (18.5 mg, 0.15 mmol) for 4 h, PdZn-ZnO (2.0 mg, 2.5 mol% Pd) and methanol (2.0 mL), to obtain **2c** (13.7 mg, 98%) as an orange liquid. <sup>1</sup>H NMR (500 MHz, CDCl<sub>3</sub>) δ = 7.17 (t, *J* = 7.6 Hz, 2H), 6.77 (td, *J* = 7.4, 0.9 Hz, 1H), 6.72 – 6.67 (m, 2H), 3.62 (s, 2H). GC-MS: *m/z* = 93.1 [M]<sup>+</sup>.

### 4-Chloroaniline (**2d**)<sup>4</sup>

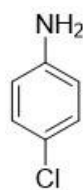

**2d**

Following the general procedure for the reduction of nitroarenes, reaction was performed with 4-chloronitrobenzene **1d** (23.6 mg, 0.15 mmol), PdZn-ZnO (2.0 mg, 2.5 mol% Pd) and methanol (2.0 mL) for 8 h, to obtain **2e** (18.9 mg, 99%) as an orange solid. <sup>1</sup>H NMR (500 MHz, CDCl<sub>3</sub>) δ = 7.10 (d, *J* = 8.7 Hz, 2H), 6.60 (d, *J* = 8.7 Hz, 2H), 3.63 (s, 2H). GC-MS: *m/z* = 127.1 [M]<sup>+</sup>.

### 4-Aminophenol (**2e**)<sup>5</sup>

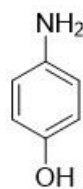

**2e**

Following the general procedure for the reduction of nitroarenes, reaction was performed with 4-nitrophenol **1e** (20.9 mg, 0.15 mmol), PdZn-ZnO (2.0 mg, 2.5 mol% Pd) and methanol (2.0 mL) for 8 h, to obtain **2e** (15.5 mg, 95%) as a pale brown solid. <sup>1</sup>H NMR (500 MHz, CD<sub>3</sub>OD) δ = 6.66 – 6.62 (m, 2H), 6.62 – 6.58 (m, 2H). GC-MS: *m/z* = 109.1 [M]<sup>+</sup>.

### Aniline (**2c**)<sup>3</sup>

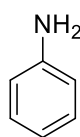

**2c**

Following the general procedure for the reduction of nitroarenes, reaction was performed with 4-bromonitrobenzene **1f** (30.3 mg, 0.15 mmol), PdZn-ZnO (2.0 mg, 2.5 mol% Pd) and methanol (2.0 mL) for 8 h, to obtain **2c** (13.6 mg, 97 %) as an orange liquid. <sup>1</sup>H NMR (500 MHz, CDCl<sub>3</sub>) δ = 7.17 (t, *J* = 7.6 Hz, 2H), 6.77 (td, *J* = 7.4, 0.9 Hz, 1H), 6.72 – 6.67 (m, 2H), 3.62 (s, 2H). GC-MS: *m/z* = 93.1 [M]<sup>+</sup>.

### Recycling of PdZn-ZnO catalyst for the hydrogenation of 4-nitrobenzonitrile (**1a**)

Reaction conditions were as follows: 4-nitrobenzonitrile **1a** (44.6 mg, 0.3 mmol), PdZn-ZnO (4.0 mg, 2.5 mol% Pd), MeOH (2.0 mL), room temperature, 3 h. Upon completion of the reaction cycle, the reaction mixture was centrifuged and decanted. Afterwards, the catalyst was washed with MeOH (2 × 1.0 mL) and dried under vacuum until completely dry. The catalyst was then used in the second and further reaction cycles, following the general procedure.

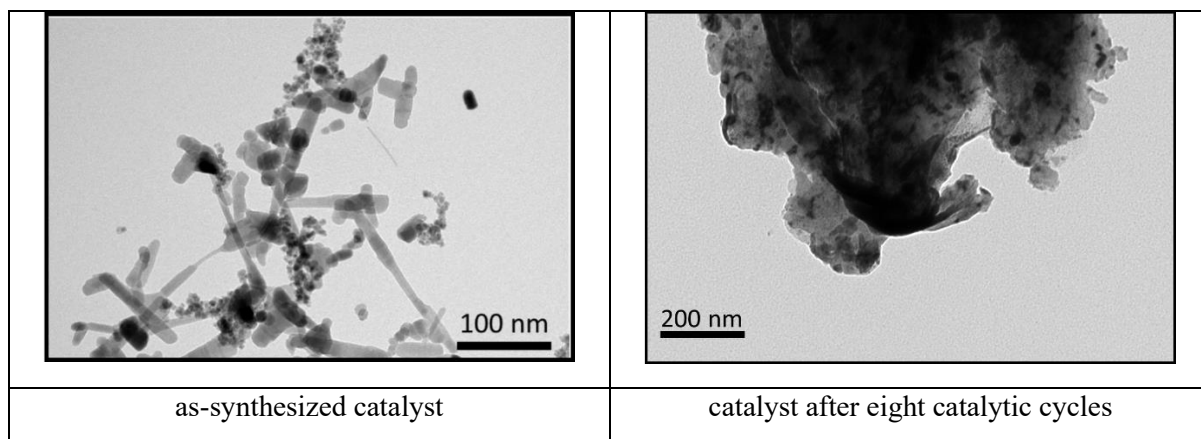

### Hot filtration test

Reaction conditions were as follows: 4-nitrobenzonitrile **1a** (22.3 mg, 0.15 mmol), PdZn-ZnO (2.0 mg, 2.5 mol% Pd), MeOH (1.0 mL), room temperature, 3 h. Upon completion of the reaction cycle, the reaction mixture was heated at 50 °C and filtered through a hot funnel. **1a** (22.3 mg, 0.15 mmol) and MeOH (1 mL) were added into the obtained, clear filtrate, and the reaction proceeded for additional 3 h. Upon completion of the reaction cycle, column chromatography (Hex:EtOAc) was used to separate the starting compound from the product. 18.5 mg (83%) of **1a** was recovered from the reaction mixture.

### Scale-up test

Following the general procedure for the reduction of nitroarenes, scale-up reaction was performed with 4-nitrobenzonitrile **1a** (148.1 mg, 1.0 mmol), PdZn-ZnO (13.3 mg, 2.5 mol% Pd) and MeOH (20.0 mL) for 3h, to obtain **2a** (114.6 mg, 97%) as a pale-yellow solid.

## General procedure for the hydrodebromination of bromoarenes

### Naphthalene (4a)<sup>6</sup>

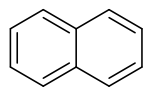

4a

To a round bottom cuvette equipped with a magnetic stirrer, 2-bromonaphthalene **3a** (31.1 mg, 0.15 mmol), PdZn-ZnO (2.0 mg, 2.5 mol% Pd) and methanol (2.0 mL) were added. Hydrogen was introduced into the reaction mixture through a rubber balloon (1 atm H<sub>2</sub>) at room temperature, for 24 h. The reaction mixture was separated from the catalyst by filtering it through a thin layer of silica gel, and the layer was washed several times with methylene chloride. Solvents were removed under reduced pressure to obtain **4a** (18.4 mg, 96%), as a white solid. <sup>1</sup>H NMR (500 MHz, CDCl<sub>3</sub>) δ = 7.86 (dd, J = 6.2, 3.3 Hz, 4H), 7.50 (dd, J = 6.3, 3.2 Hz, 4H). GC-MS: m/z = 128.1 [M]<sup>+</sup>.

### Benzonitrile (4b)

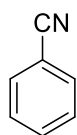

4b

Following the general procedure for the hydrodebromination of bromoarenes, reaction was performed with 4-bromobenzonitrile **3b** (27.3 mg, 0.15 mmol), PdZn-ZnO (2.0 mg, 2.5 mol% Pd) and methanol (2.0 mL) for 4 h, to afford **4b**. GC-MS yield: 93%, based on naphthalene as an internal standard. GC-MS: m/z = 103.0 [M]<sup>+</sup>.

### Chlorobenzene (4c)

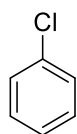

4c

Following the general procedure for the hydrodebromination of bromoarenes, reaction was performed with 1-bromo-4-chlorobenzene **3c** (28.7 mg, 0.15 mmol), PdZn-ZnO (2.0 mg, 2.5 mol% Pd) and methanol (2.0 mL) for 24 h, to afford **4c**. GC-MS yield: 95%, based on naphthalene as an internal standard. GC-MS: m/z = 112.0 [M]<sup>+</sup>.

### Benzoic acid (4d)<sup>7</sup>

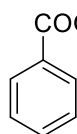

4d

Following the general procedure for the hydrodebromination of bromoarenes, reaction was performed with 4-bromobenzoic acid **3d** (30.2 mg, 0.15 mmol), PdZn-ZnO (2.0 mg, 2.5 mol% Pd) and methanol (2.0 mL) for 24 h, to afford **4d** (17.9 mg, 98%), as a. <sup>1</sup>H NMR (500 MHz, CDCl<sub>3</sub>) δ = 8.12 (d, J = 8.4 Hz, 2H), 7.62 (t, J = 7.4 Hz, 1H), 7.49 (t, J = 7.8 Hz, 2H). GC-MS: m/z = 122.1 [M]<sup>+</sup>.

### 1,3-Dimethoxybenzene (4e)<sup>8</sup>

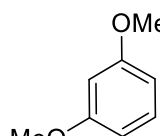

4e

Following the general procedure for the hydrodebromination of bromoarenes, reaction was performed with 1-bromo-3,5-dimethoxybenzene **3e** (32.6 mg, 0.15 mmol), PdZn-ZnO (2.0 mg, 2.5 mol% Pd) and methanol (2.0 mL) for 3 h, to afford **4e** (20.7 mg, 99%), as a pale yellow oil. <sup>1</sup>H NMR (500 MHz, CDCl<sub>3</sub>) δ = 7.19 (t, J = 8.2 Hz, 1H), 6.52 (dd, J = 8.2, 2.4 Hz, 2H), 6.48 (t, J = 2.3 Hz, 1H), 3.80 (s, 6H). GC-MS: m/z = 138.1 [M]<sup>+</sup>.

### (Trifluoromethyl)benzene (4f)

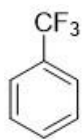

4f

Following the general procedure for the hydrodebromination of bromoarenes, reaction was performed with 1-bromo-3-(trifluoromethyl)benzene **3f** (33.8 mg, 0.15 mmol), PdZn-ZnO (2.0 mg, 2.5 mol% Pd) and methanol (2.0 mL) for 24 h, to afford **4f**. GC-MS yield: 99%, based on naphthalene as an internal standard. GC-MS:  $m/z = 146.0$   $[M]^+$ .

### Recycling of PdZn-ZnO catalyst for the hydrodebromination of 1-bromo-3,5-dimethoxybenzene (**3e**)

Reaction conditions were as follows: 1-bromo-3,5-dimethoxybenzene **3e** (65.2 mg, 0.3 mmol), PdZn-ZnO (4.0 mg, 2.5 mol%), MeOH (2.0 mL), room temperature, 3 h. Upon completion of the reaction cycle, the reaction mixture was centrifuged and decanted. Afterwards, the catalyst was washed with MeOH ( $2 \times 1.0$  mL) and dried under vacuum until completely dry. The catalyst was then used in the second and further reaction cycles, following the general procedure.

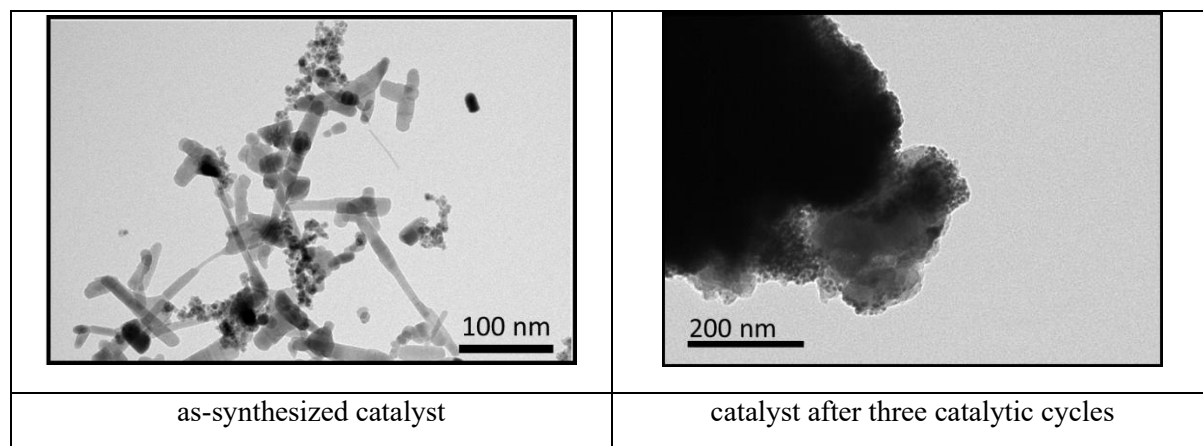

## Figures

### TEM

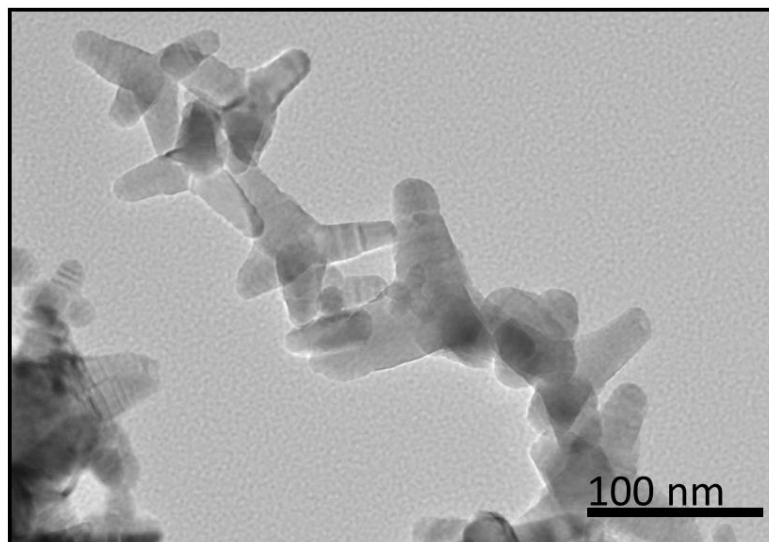

Figure S1. TEM image of CVS-ZnO.

### XPS

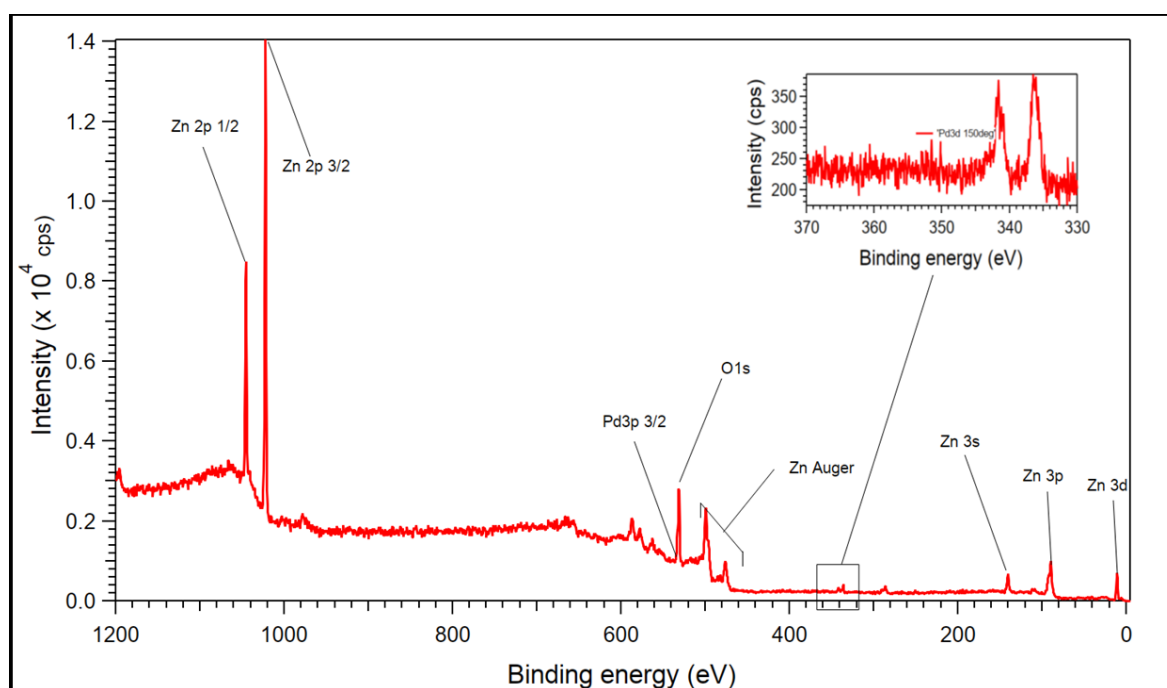

Figure S2. XPS wide scan.

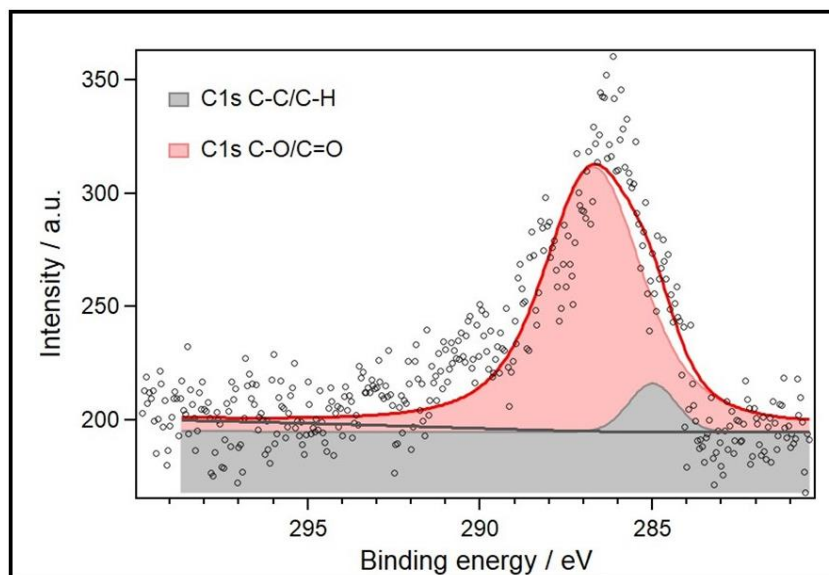

Figure S3. C1s region of XPS spectrum.

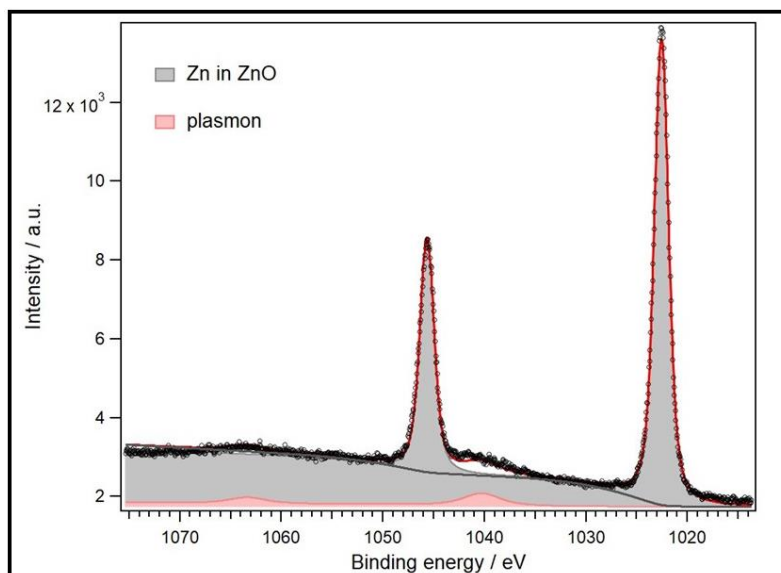

Figure S4. Zn2p region of XPS spectrum.



## References

- 1 I. Sorribes, L. Liu and A. Corma, *ACS Catal.*, 2017, **7**, 2698–2708.
- 2 J-W. Lai, Z.-Y. Liu, X.-Y. Chen, H. Zhang and H.-Y. Liu, *Tetrahedron Lett.*, 2020, **61**, 152426.
- 3 L. Li, H. Zhao, J. Wang and R. Wang, *ACS Nano*, 2014, **8**, 5352–5364.
- 4 S. Li, Y. Ma, Y. Zhao, R. Liu, Y. Zhao, X. Dai, N. Ma, C. Streb and X. Chen, *Angew. Chem., Int. Ed.*, 2023, **62**, e202314999.
- 5 M. Gholinejad, E. Oftadeh, M. Shojafar, J. M. Sansano and B. H. Lipshutz, *ChemSusChem*, 2019, **12**, 4240–4248.
- 6 M. Tobisu, K. Nakamura and N. Chatani, *J. Am. Chem. Soc.*, 2014, **136**, 5587–5590.
- 7 L. Wang, H. Neumann and M. Beller, *Angew. Chem. Int. Ed.*, 2018, **57**, 6910-6914.
- 8 A. Dewanji, C. Mück-Lichtenfeld and A. Studer, *Angew. Chem. Int. Ed.*, 2016, **55**, 6749-6752.

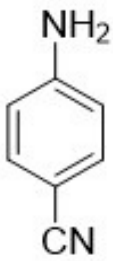

**2a**

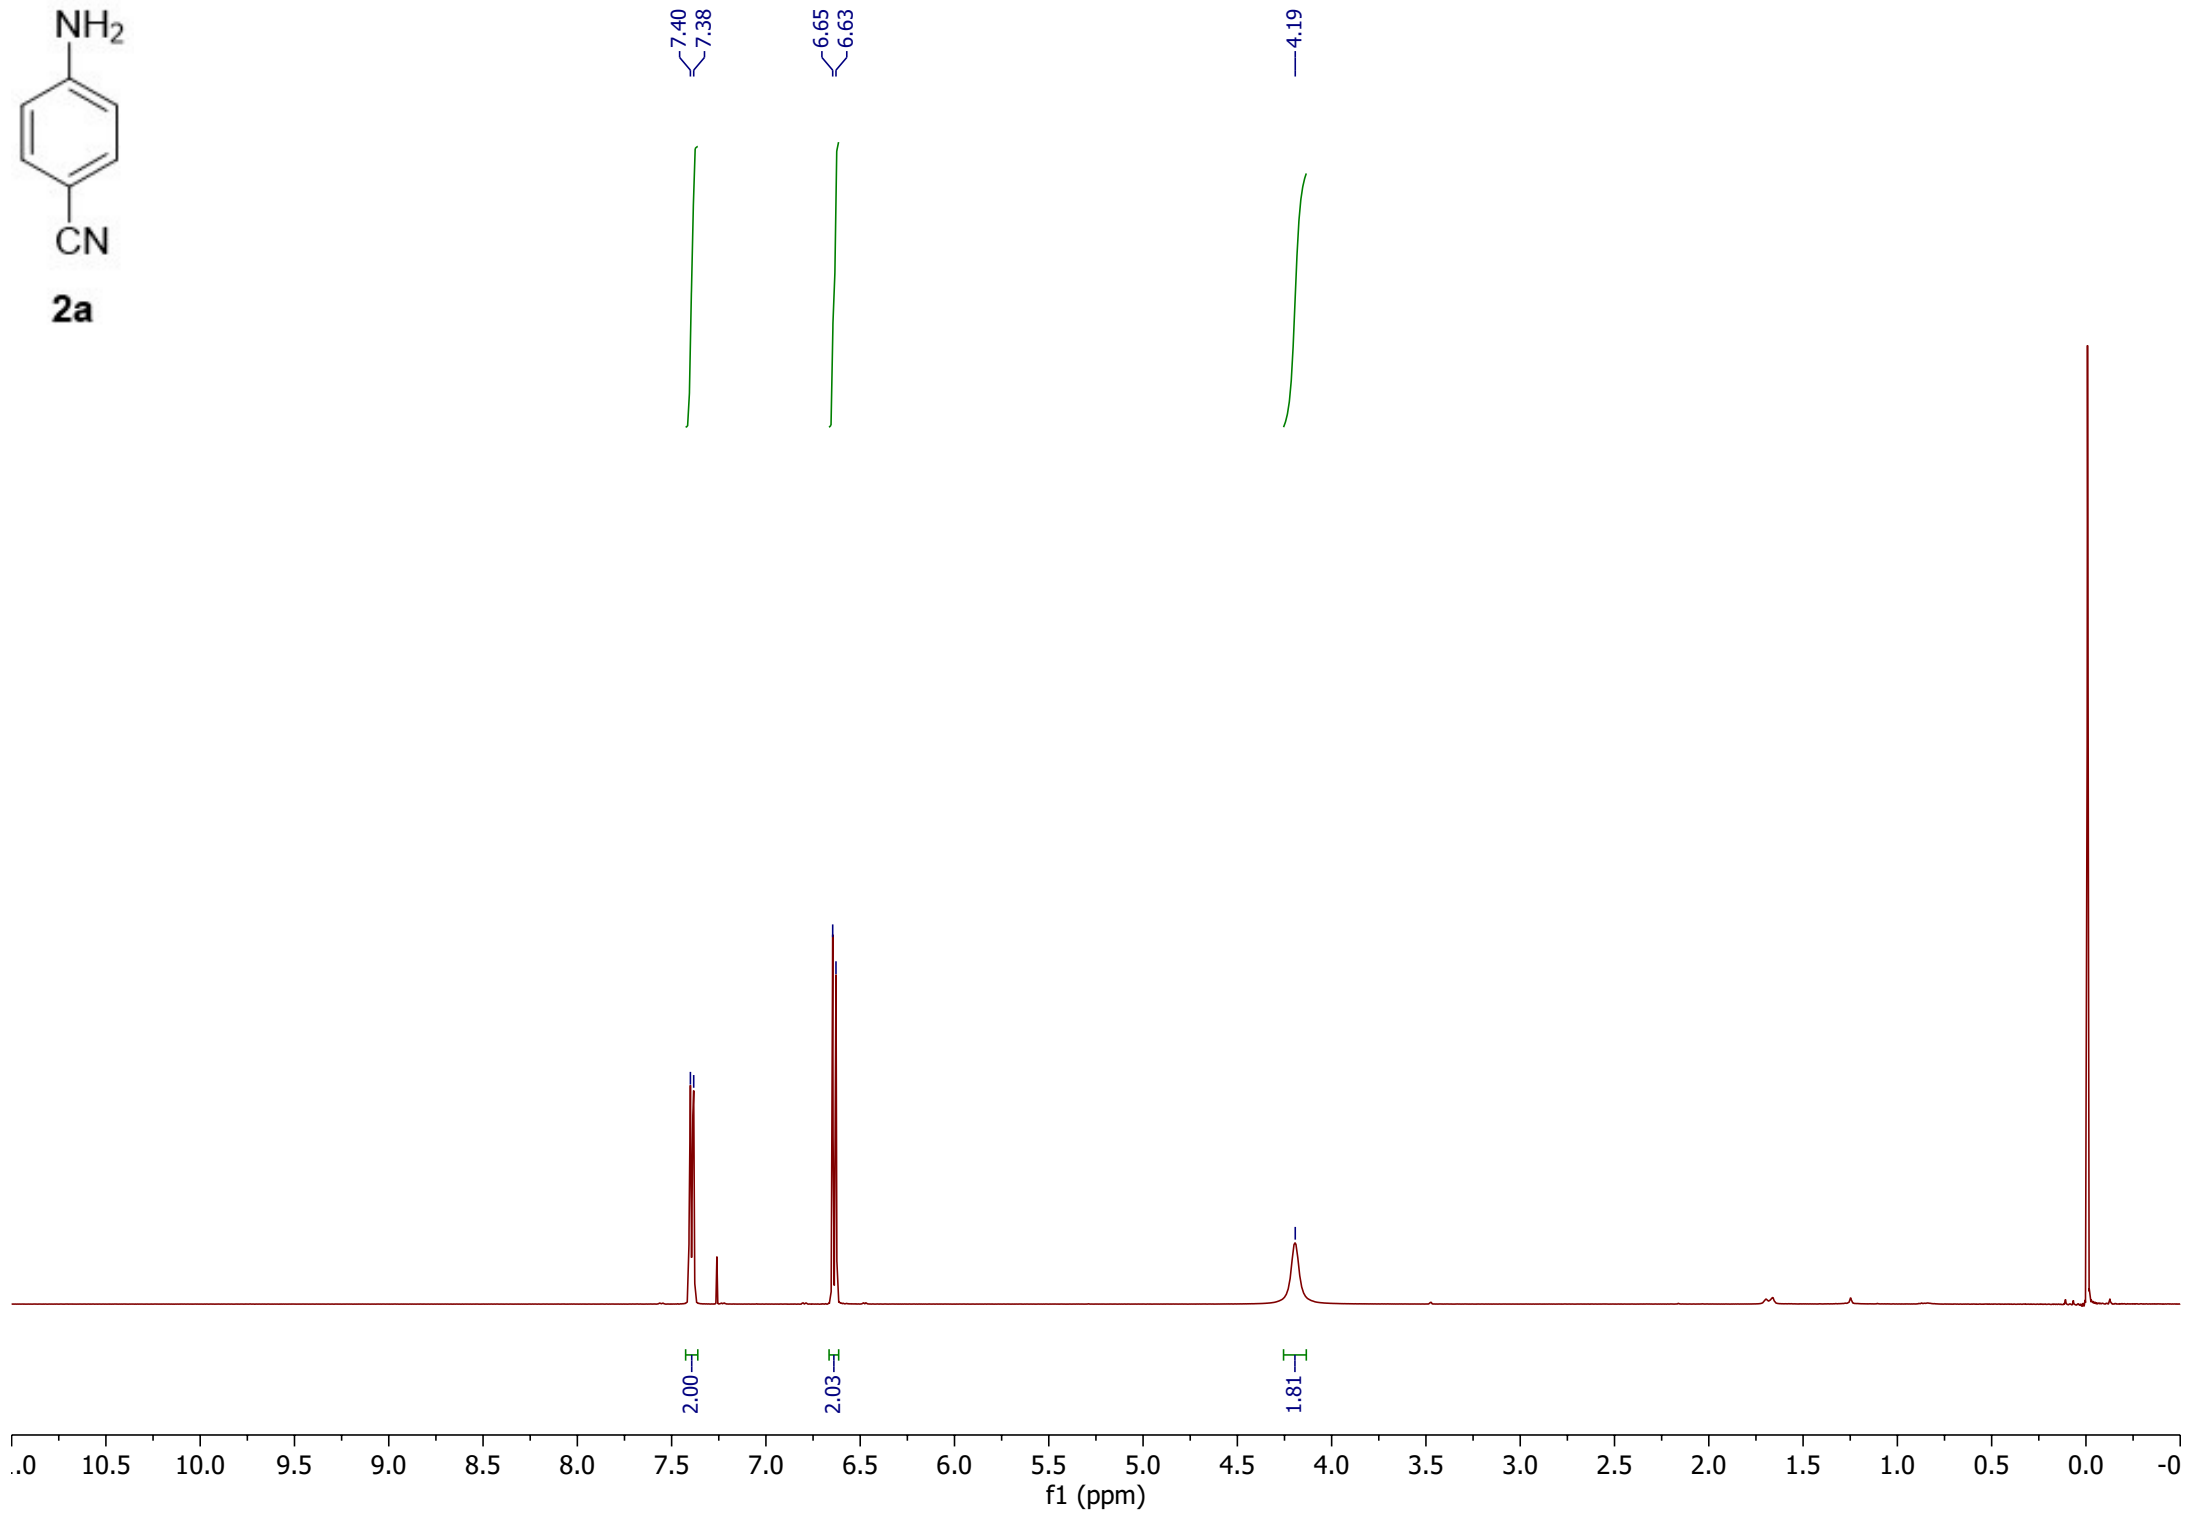

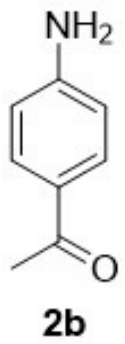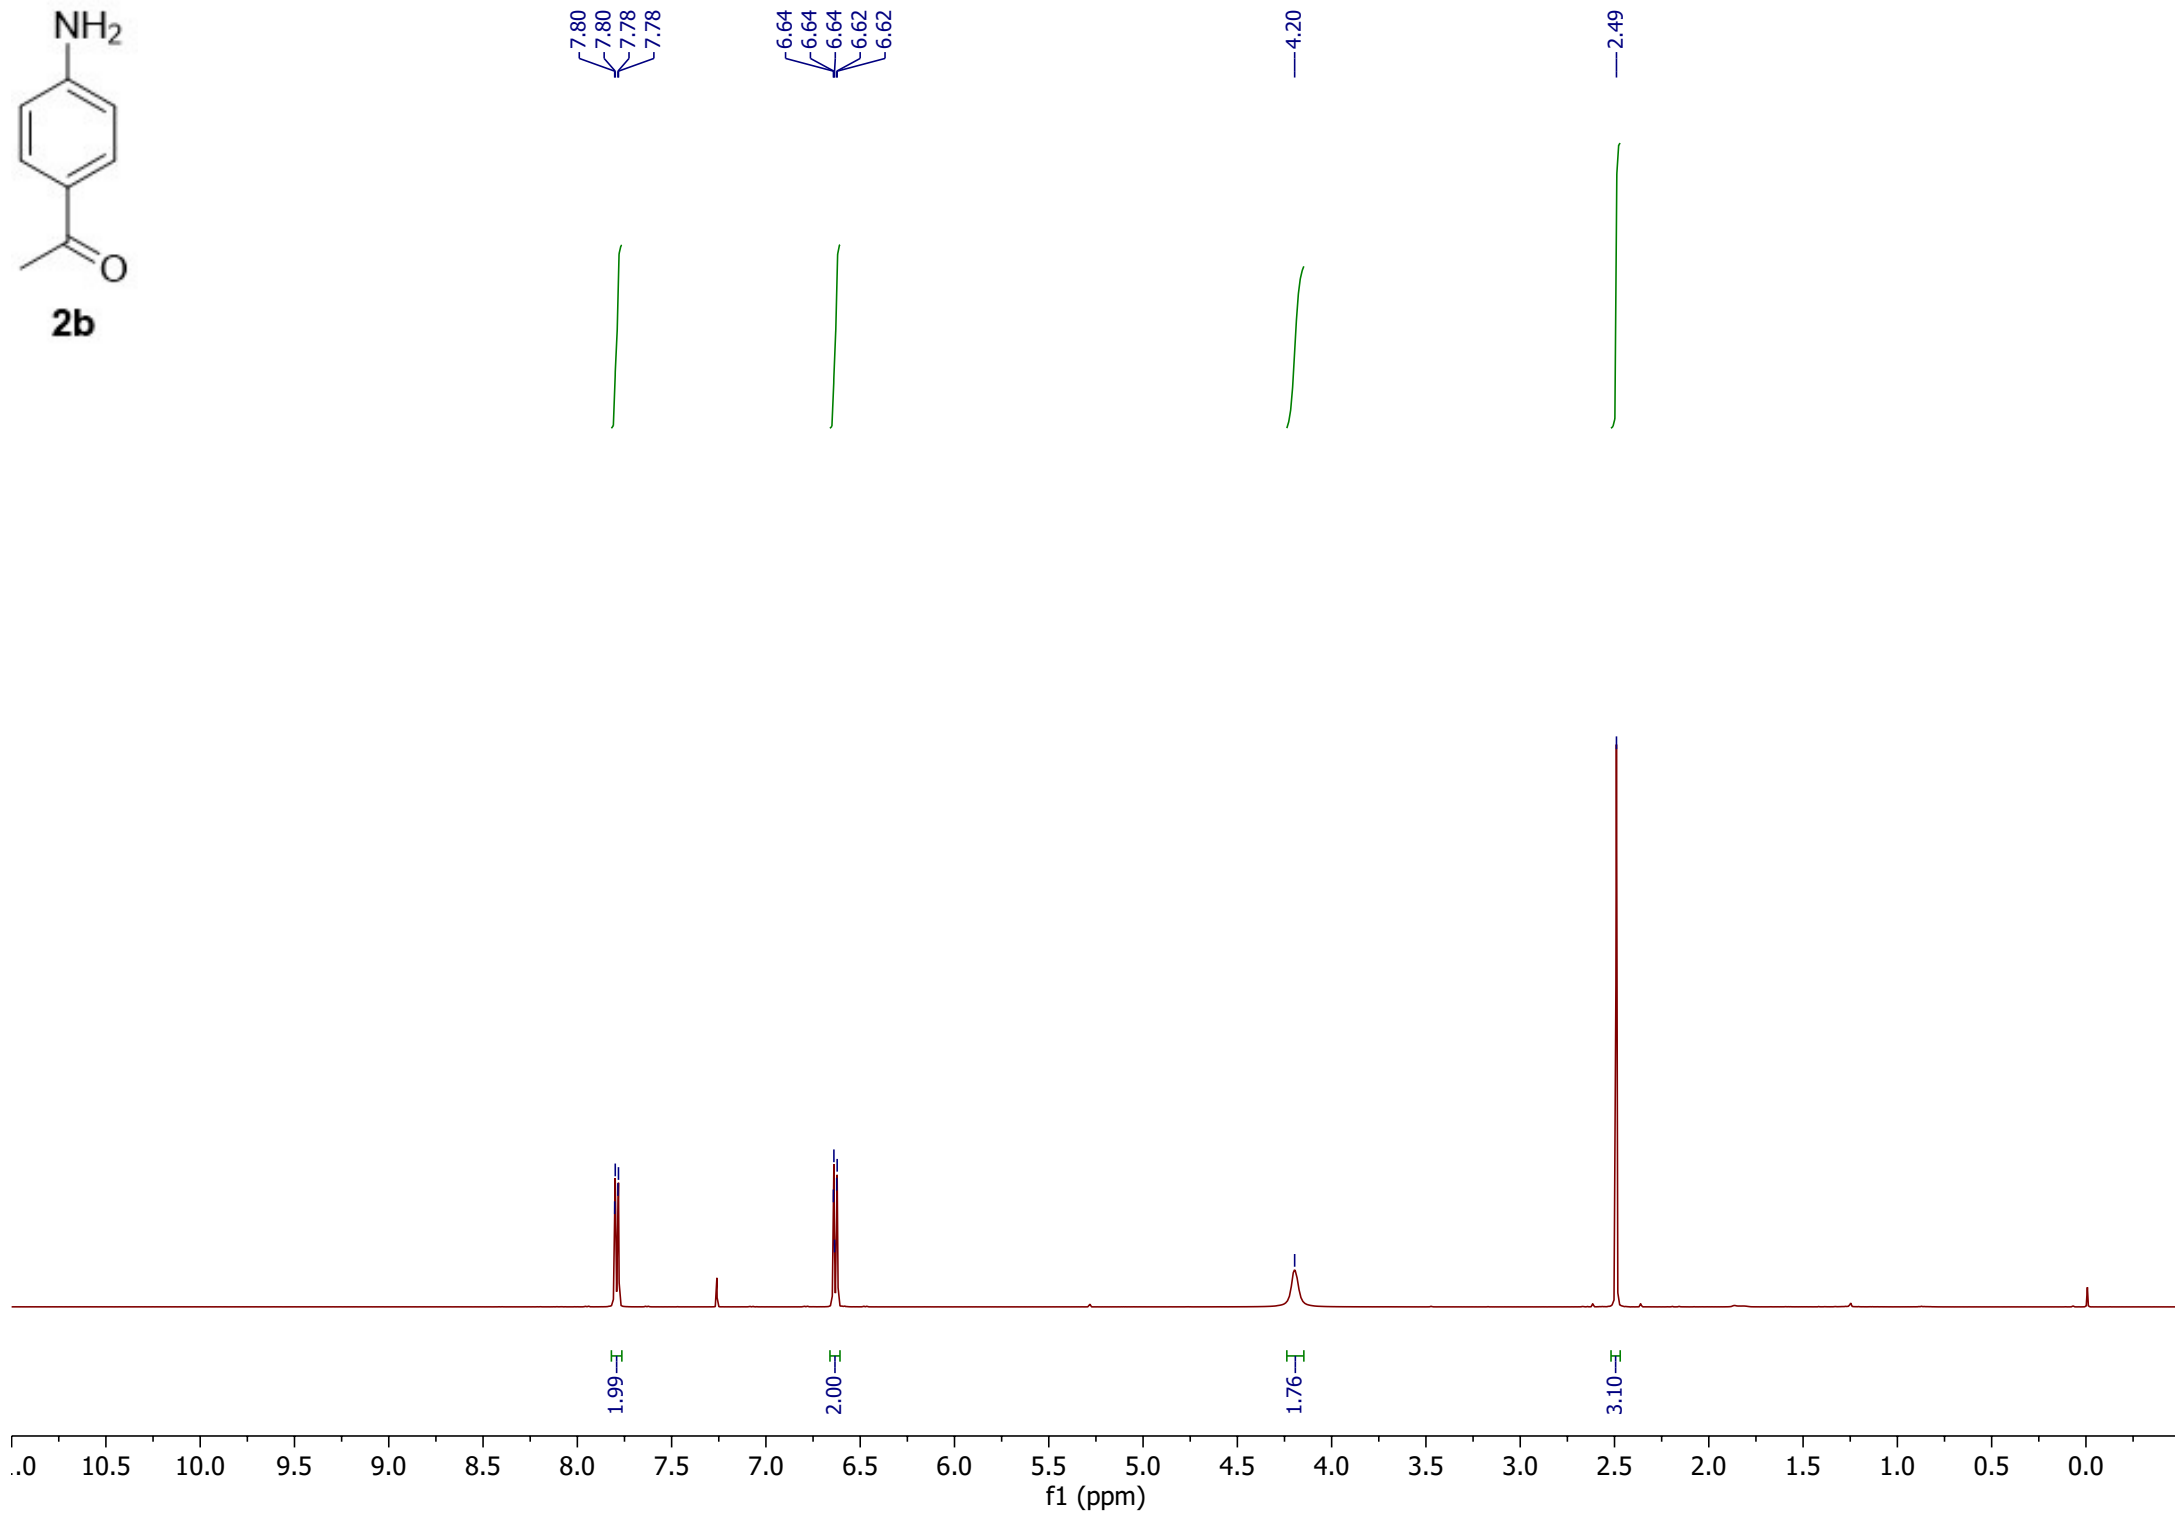

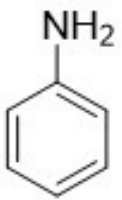

2c

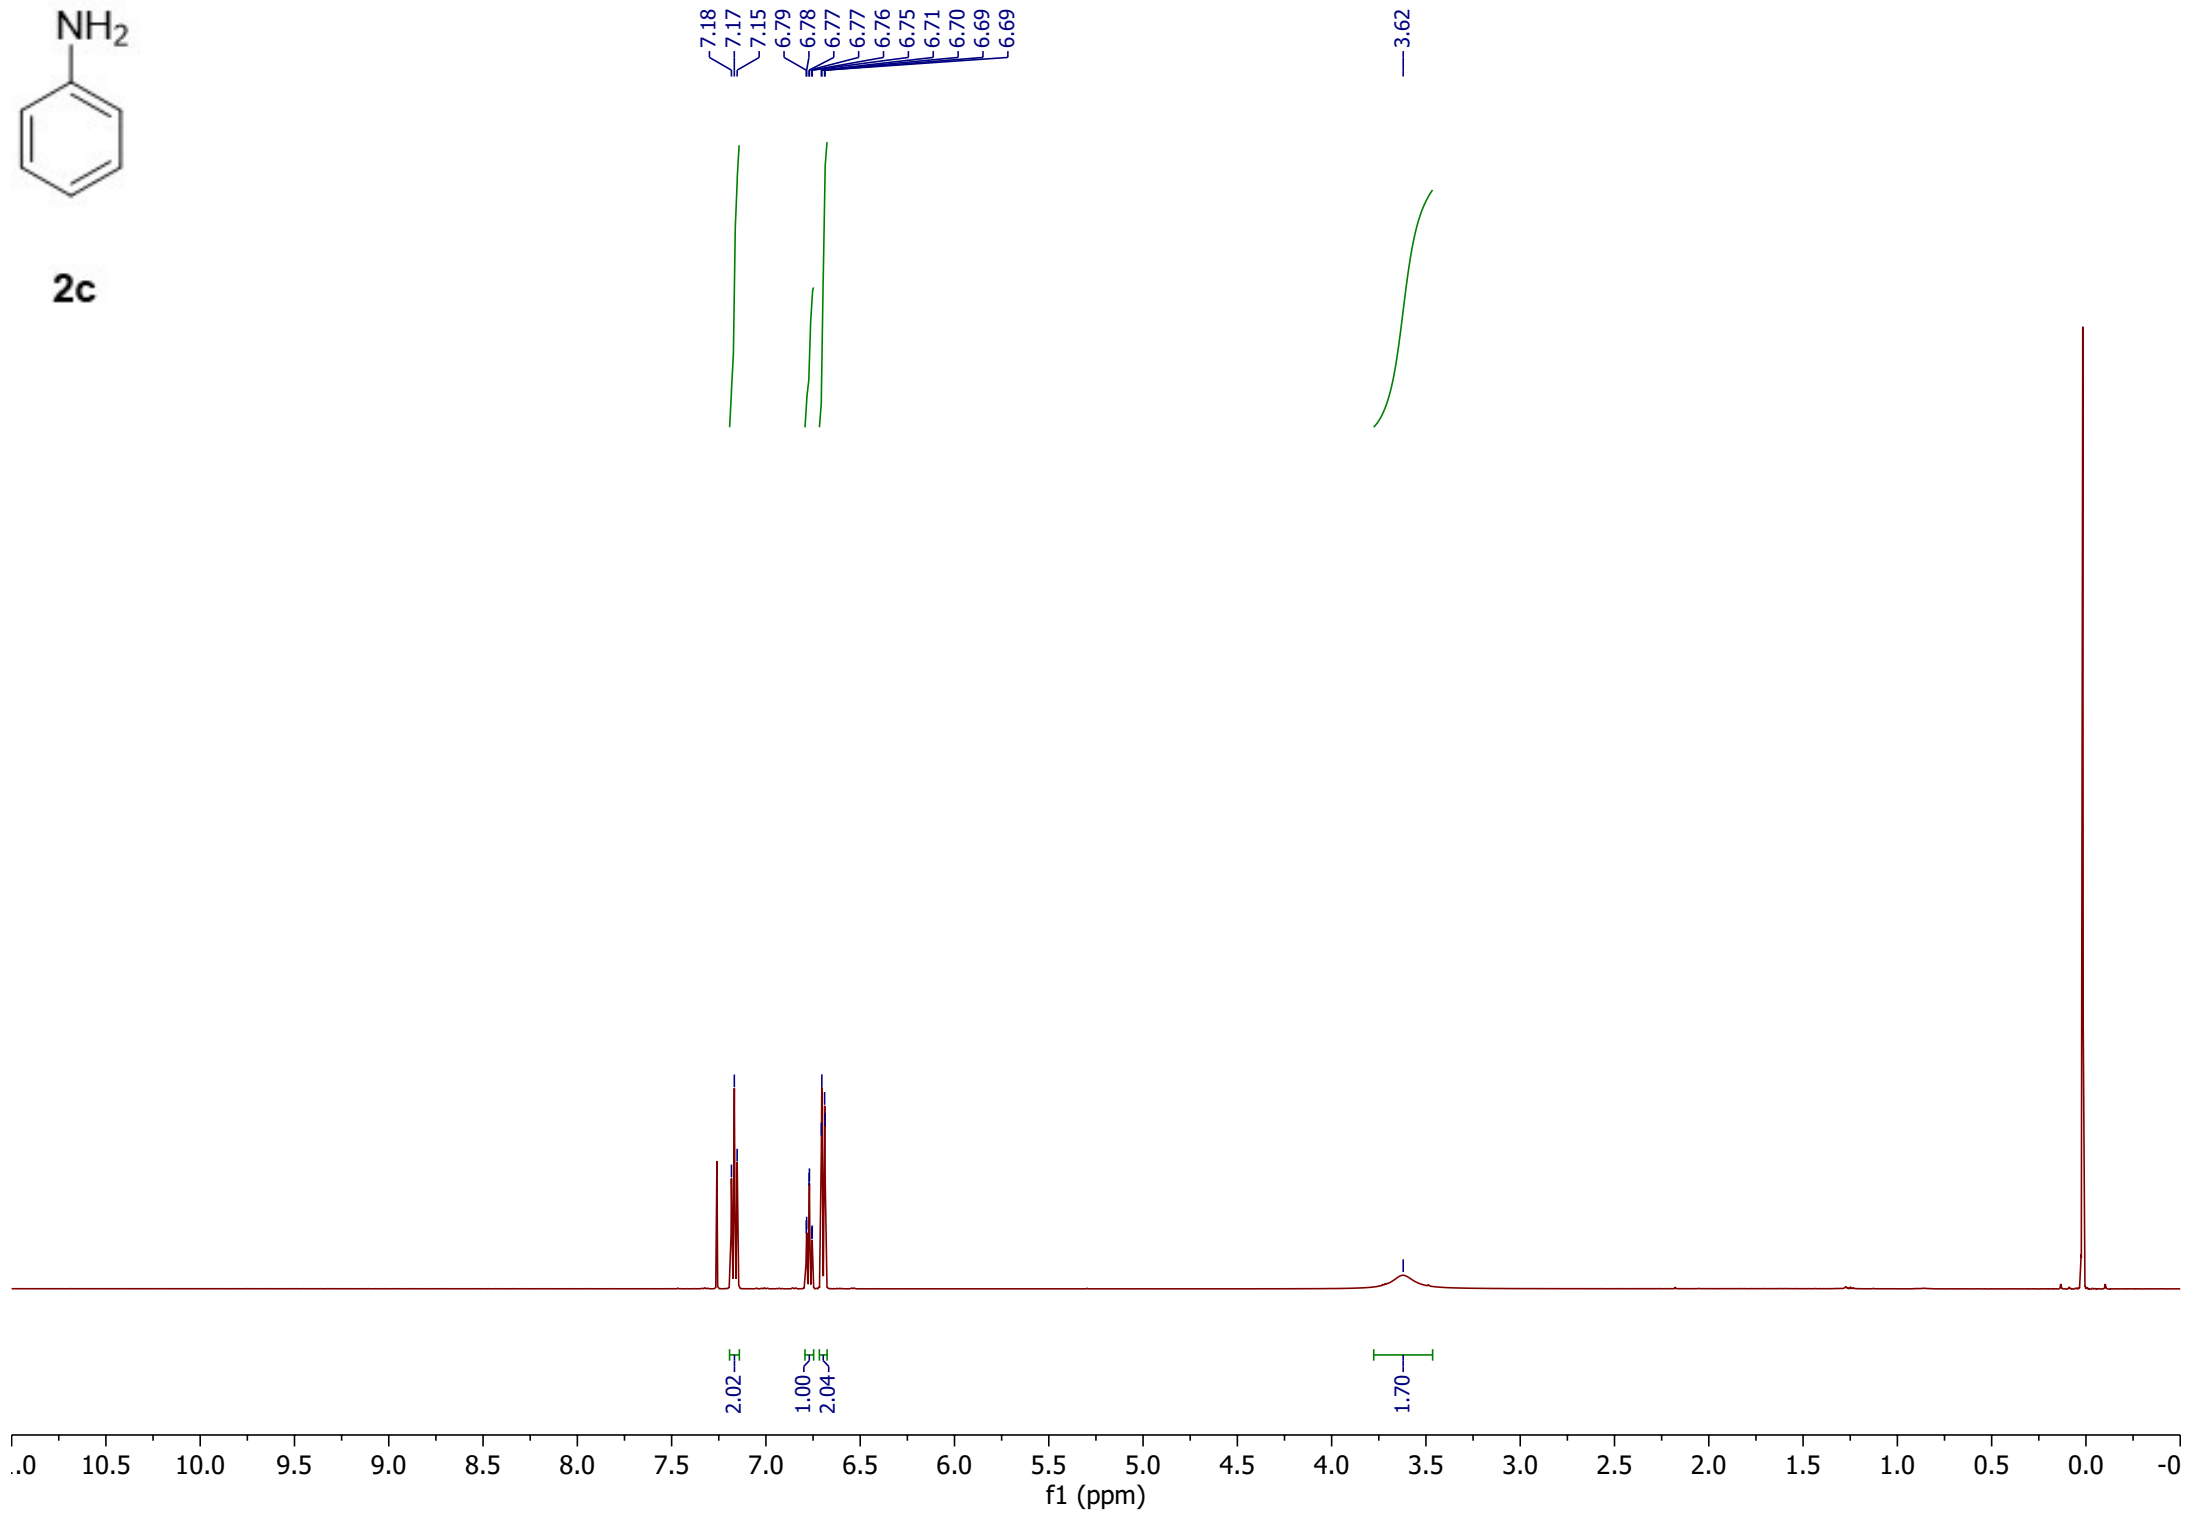

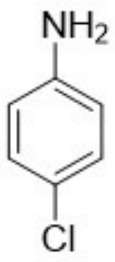

**2d**

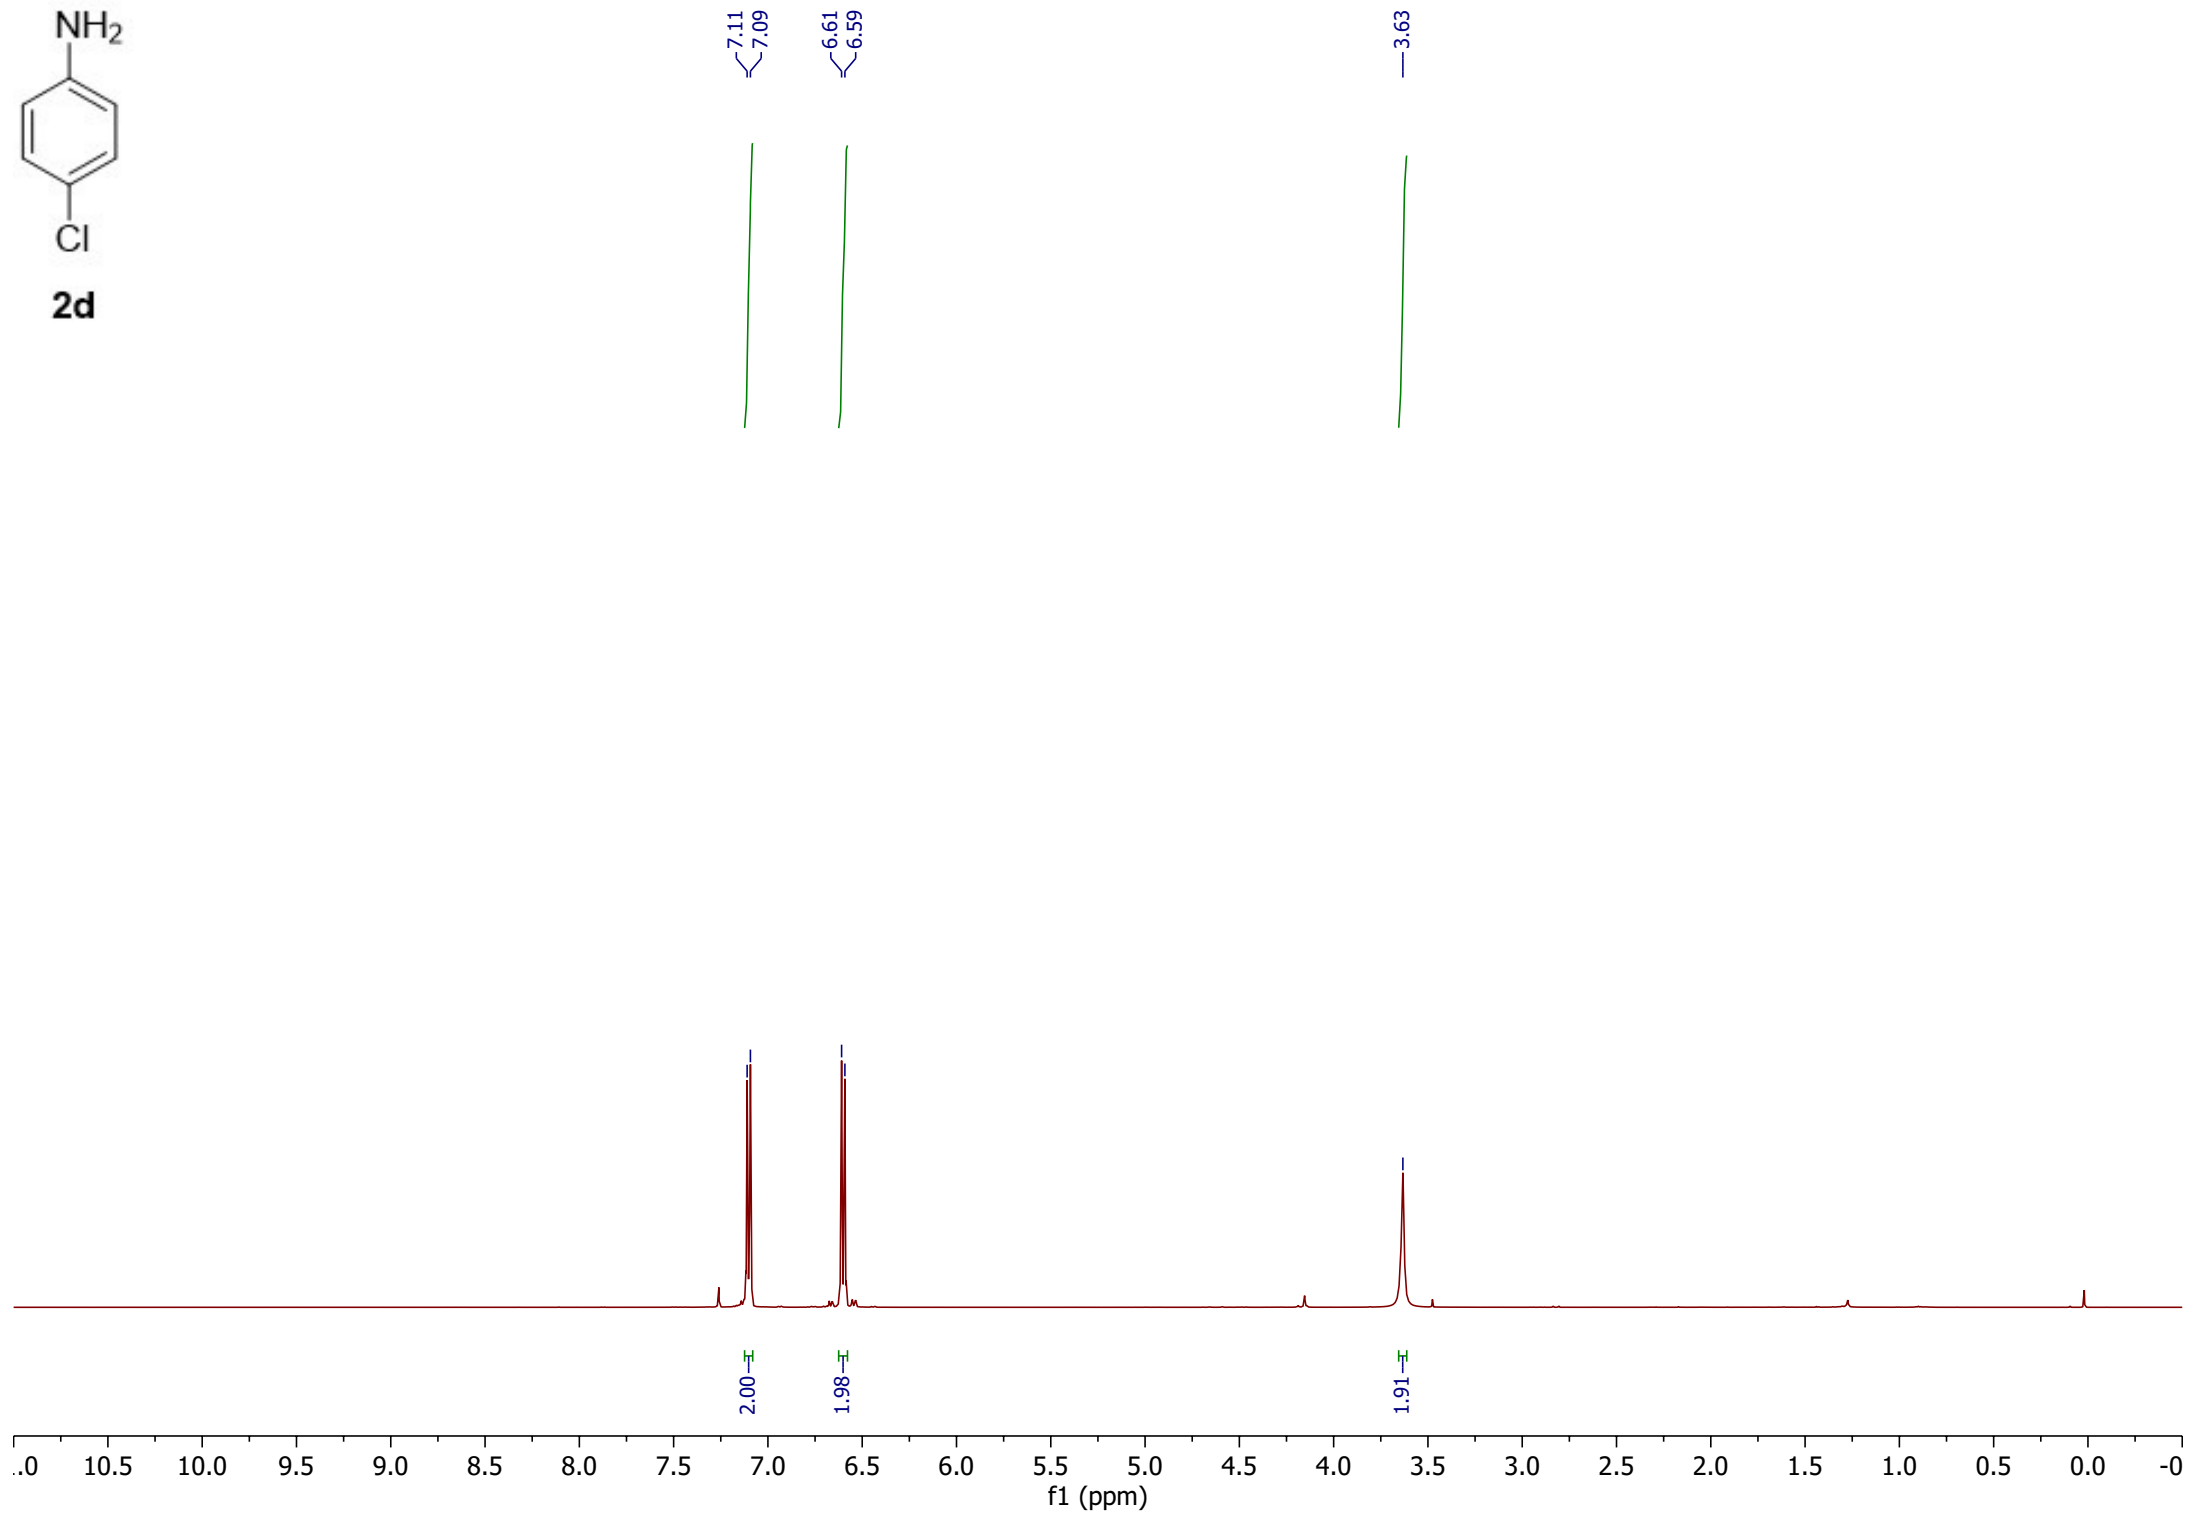

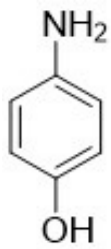

**2e**

6.65  
6.65  
6.64  
6.63  
6.63  
6.61  
6.60  
6.59  
6.59

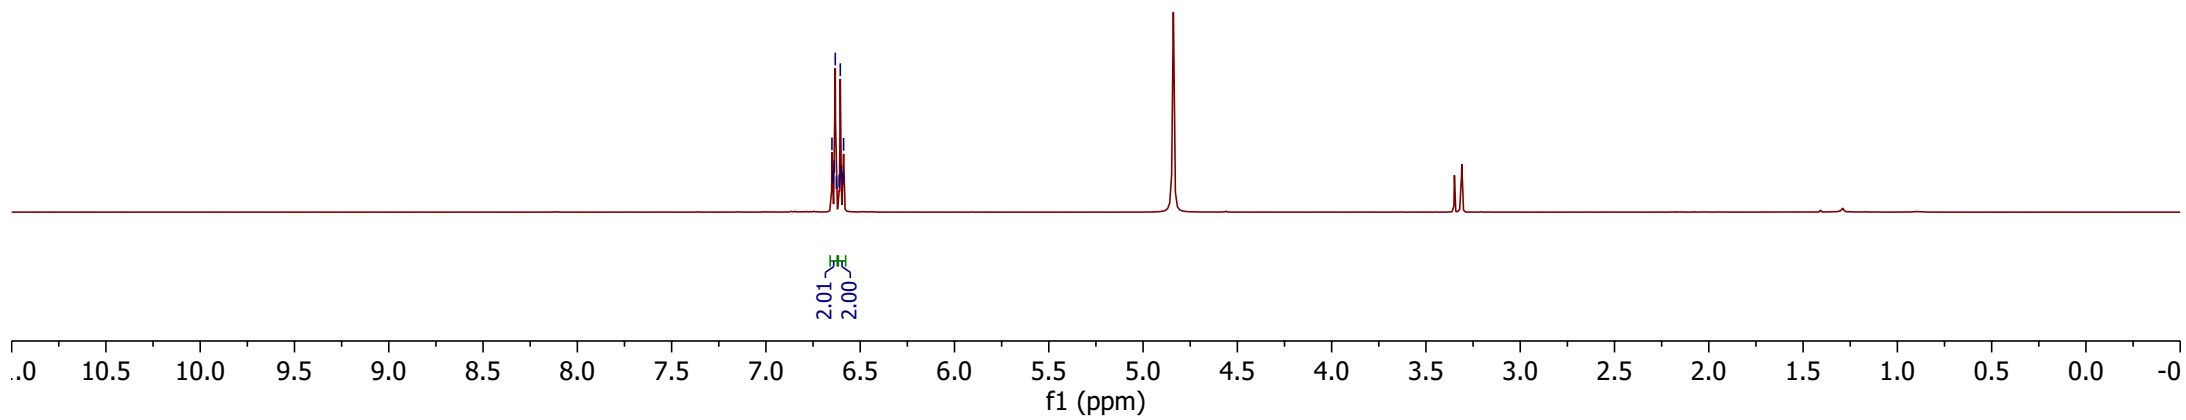

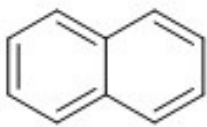

4a

7.87  
7.87  
7.86  
7.86  
7.51  
7.50  
7.50  
7.49

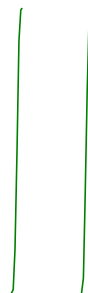

4.00

3.96

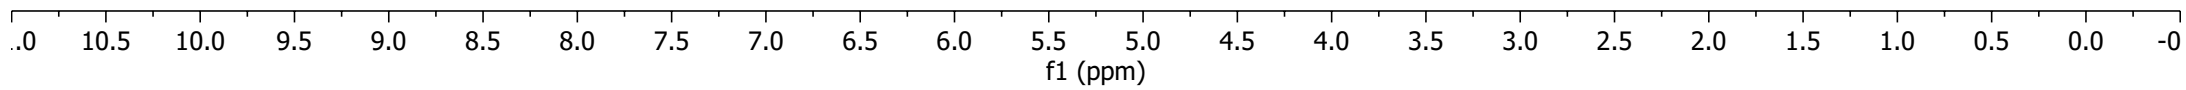

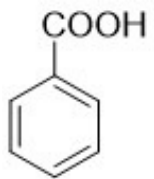

**4d**

8.13  
8.12  
7.64  
7.62  
7.61  
7.50  
7.49  
7.47  
7.26 CDCl<sub>3</sub>

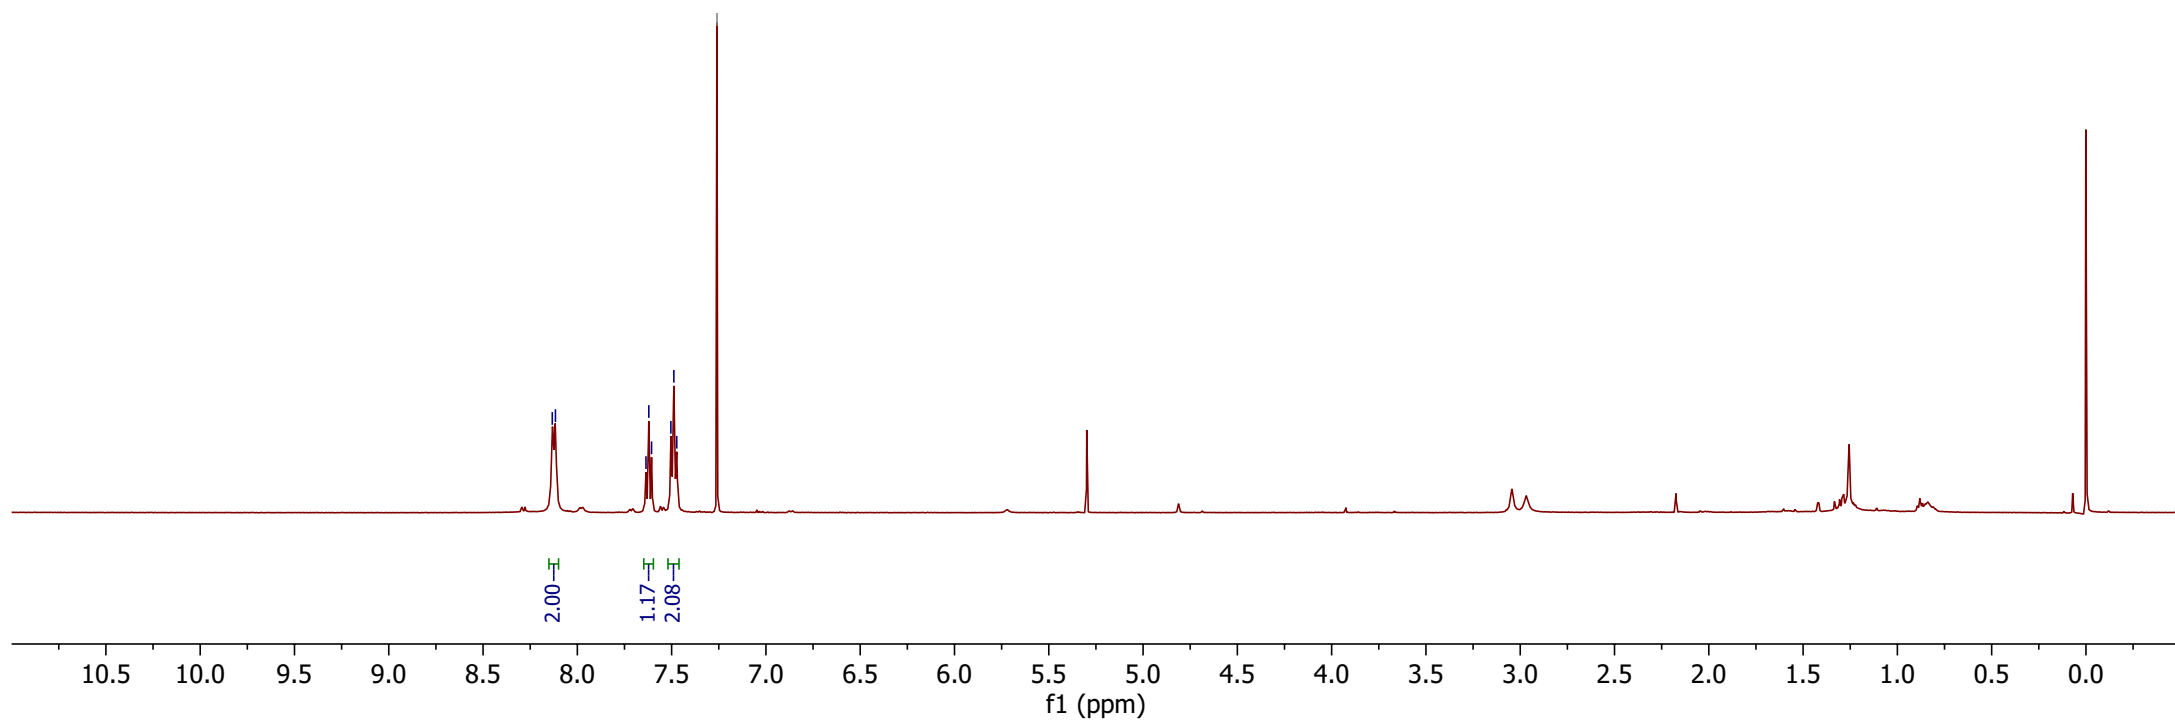



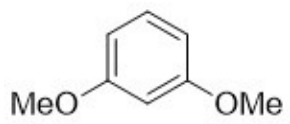

4e

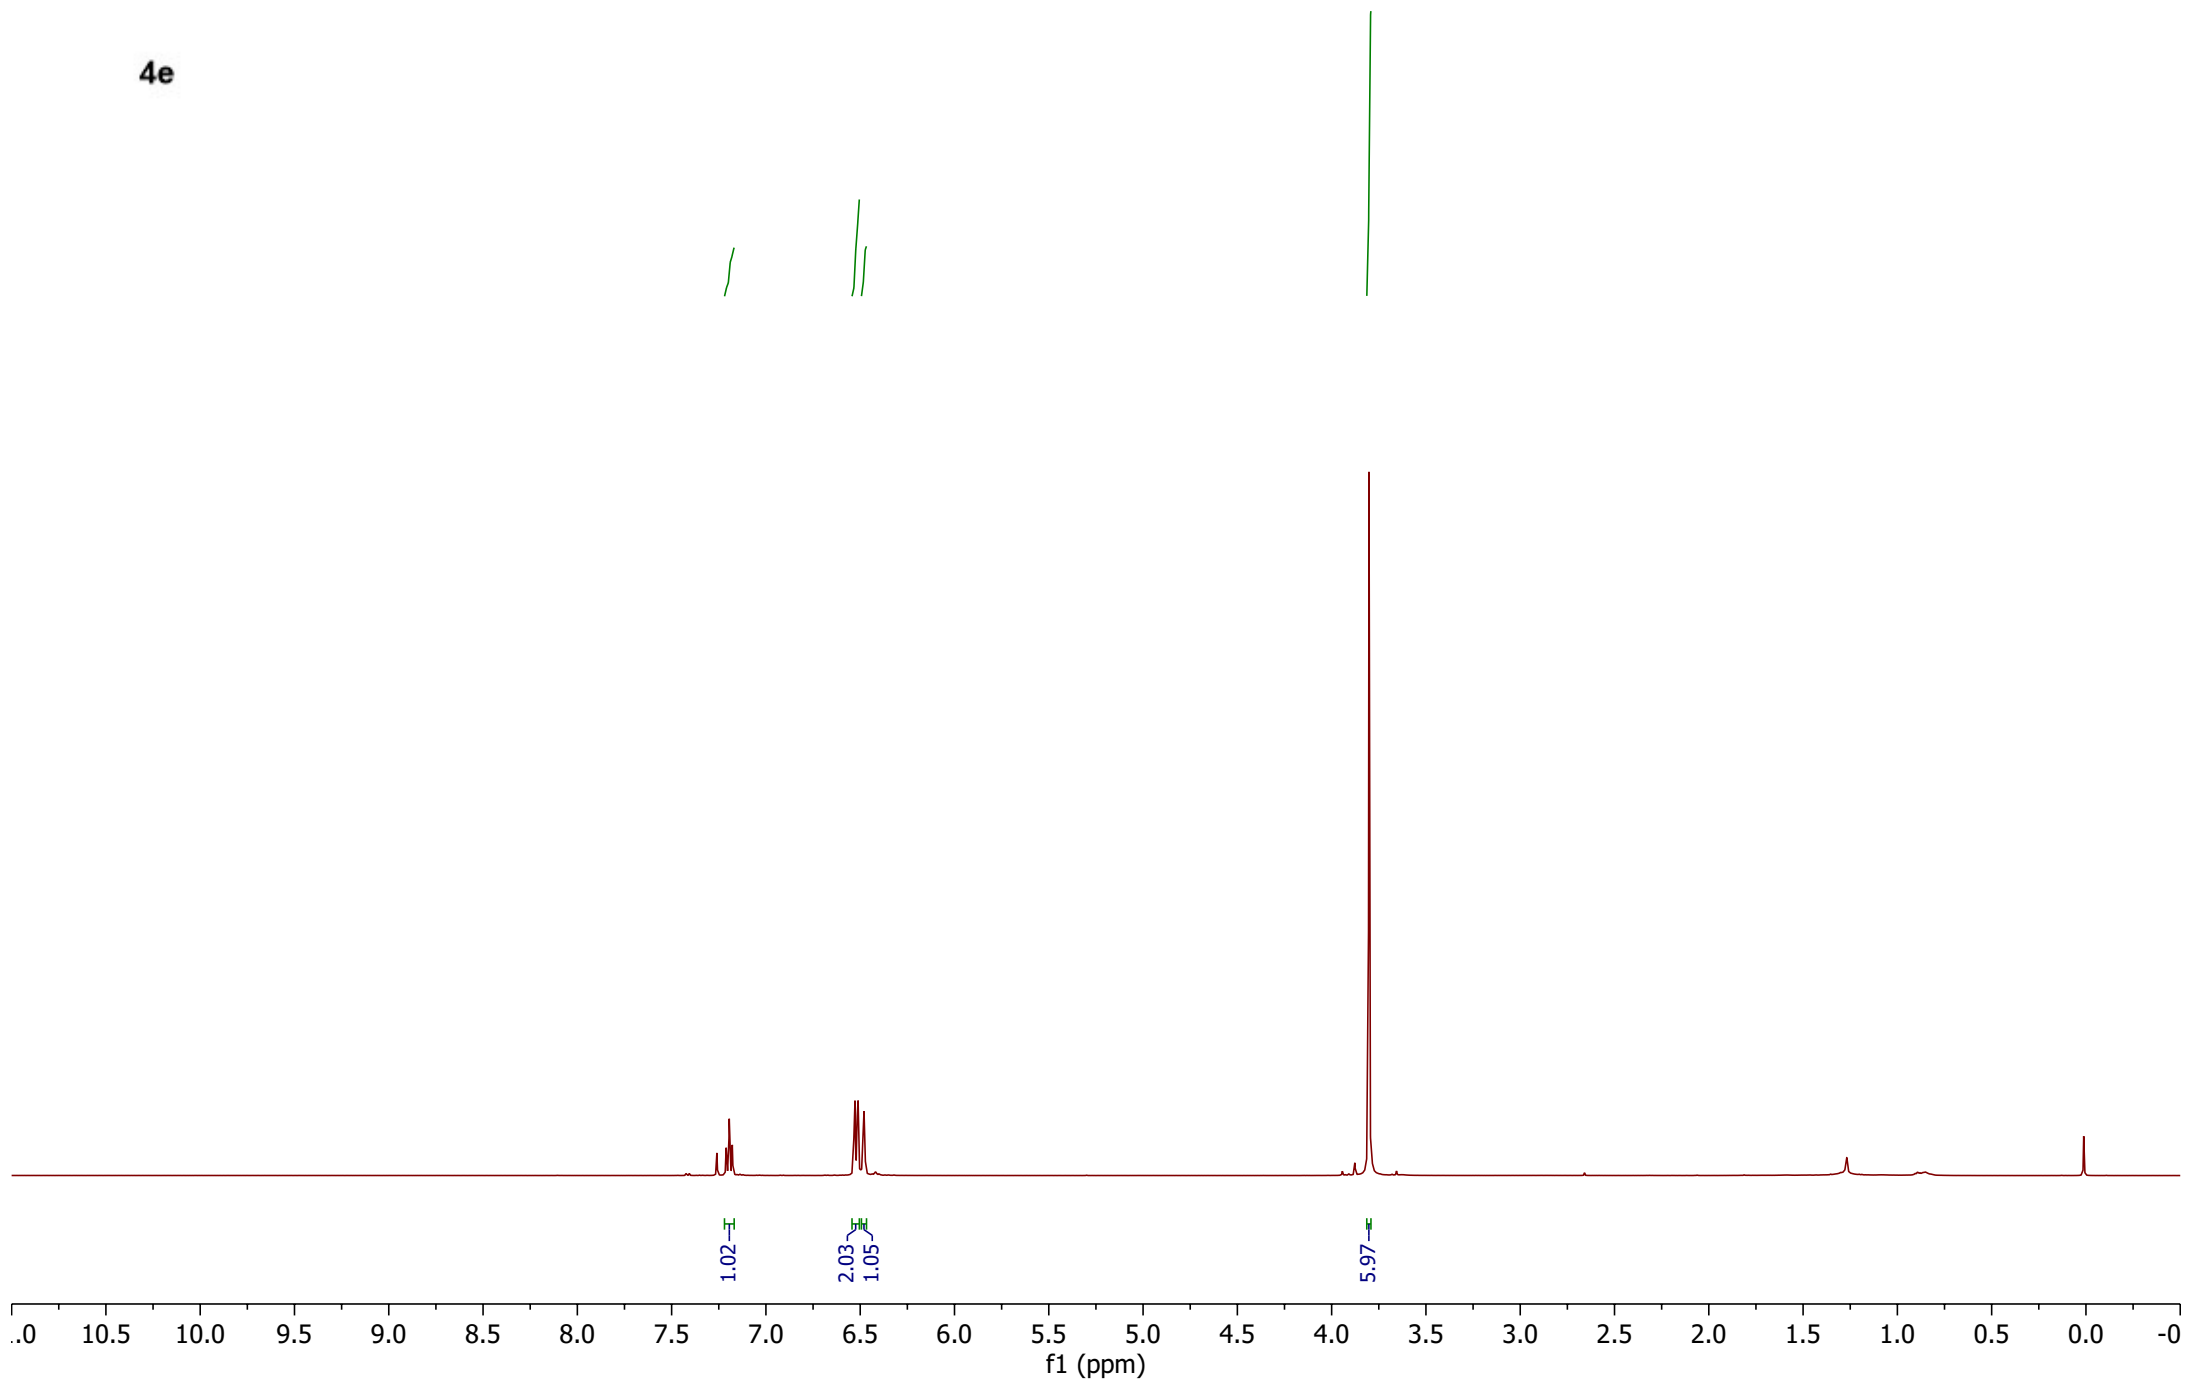

File : C:\MSD DATA\Sekvenca\20240212\AK 151 P 23062.D  
Operator :  
Acquired : 12 Feb 2024 23:18 using AcqMethod QC 5.M  
Instrument : GCMS  
Sample Name: 2a  
Misc Info :  
Vial Number: 63

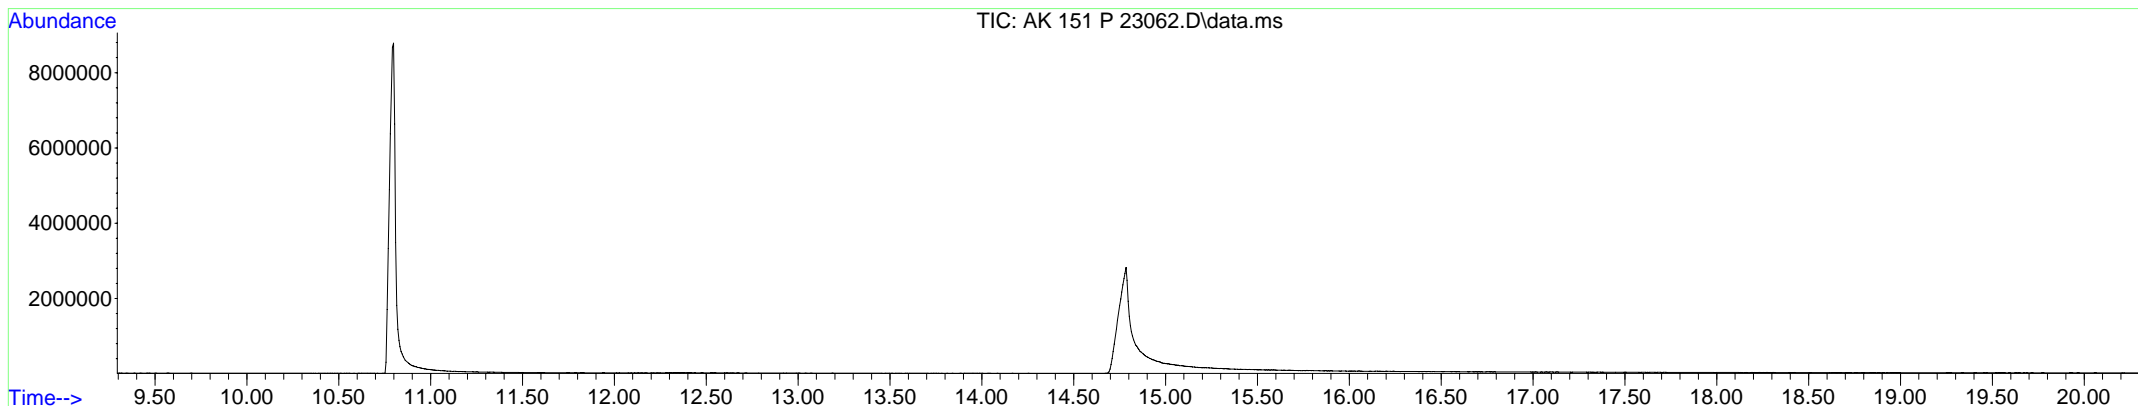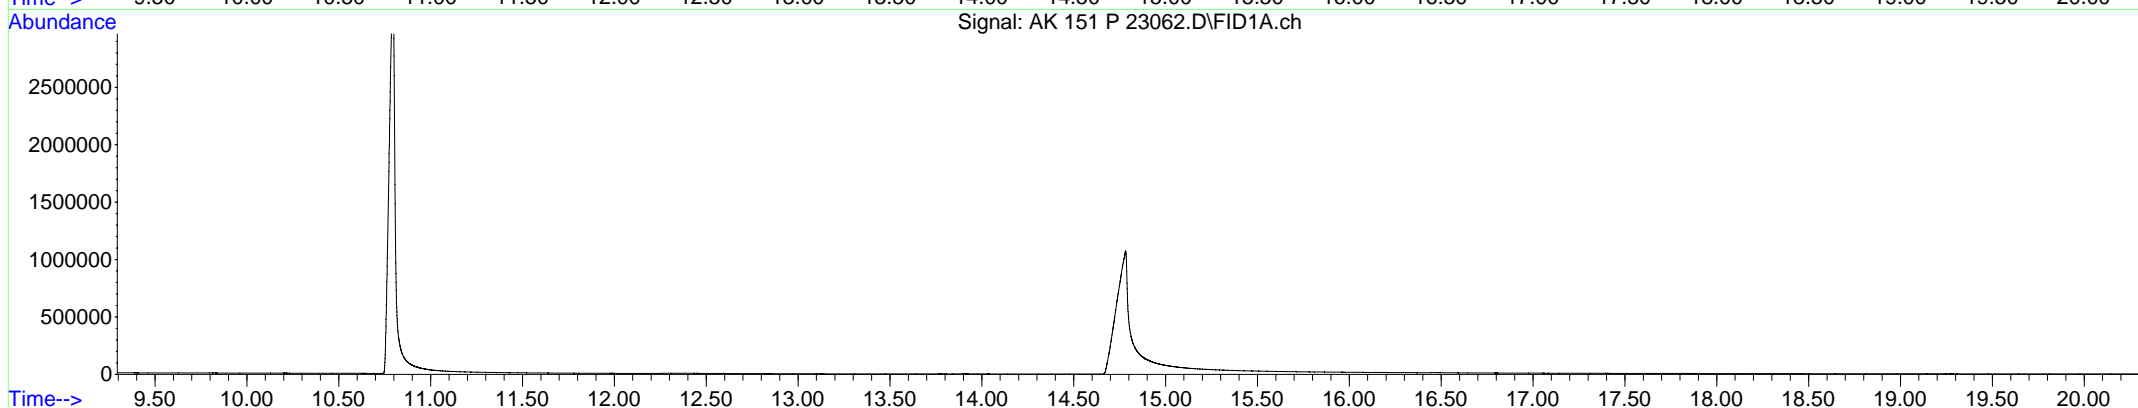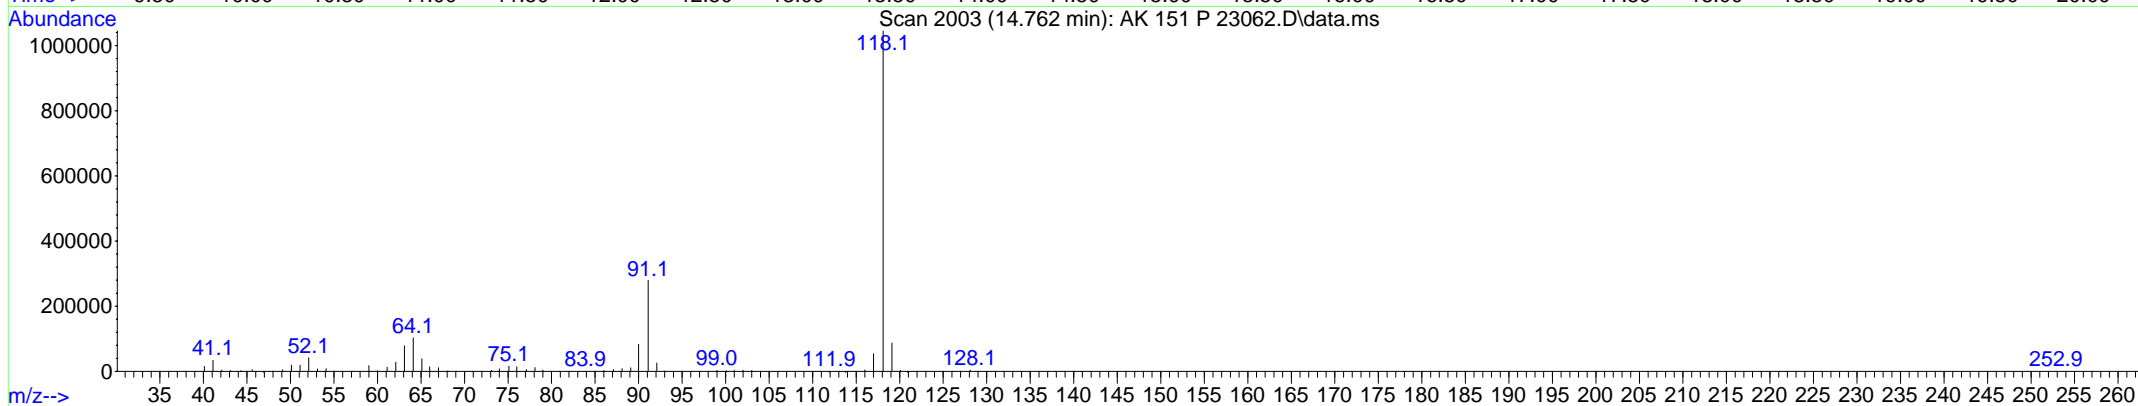

File : C:\MSD DATA\HEMIJA\IGOR OPSENICA\Kokanovic Andrija\AK 152 23  
... 267 P .D  
Operator :  
Instrument : GCMS  
Acquired : 27 Feb 2024 13:51 using AcqMethod QC 5 ak.M  
Sample Name: 2b  
Misc Info :

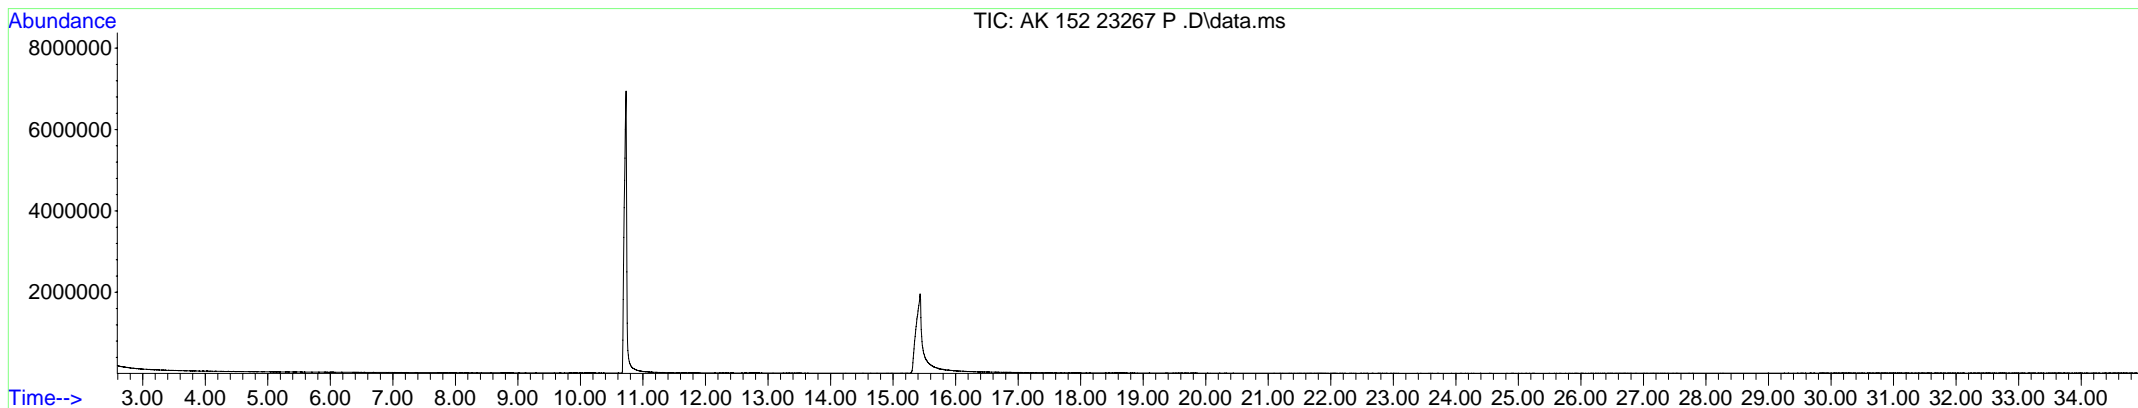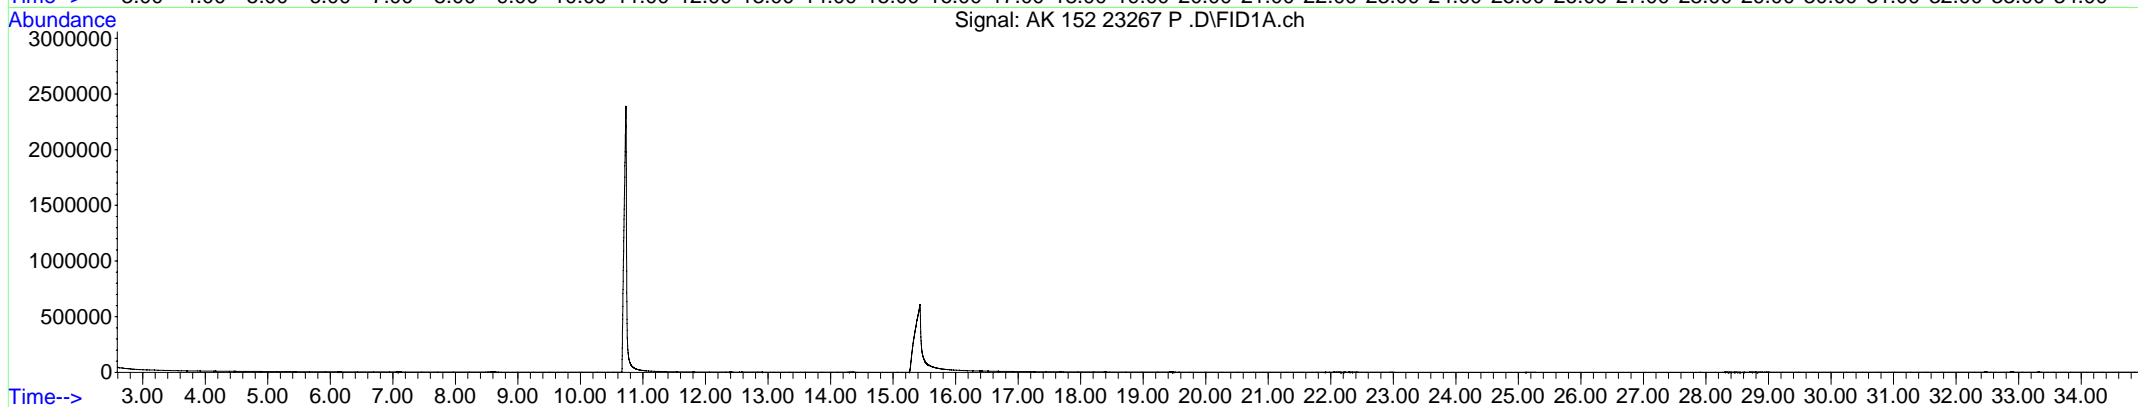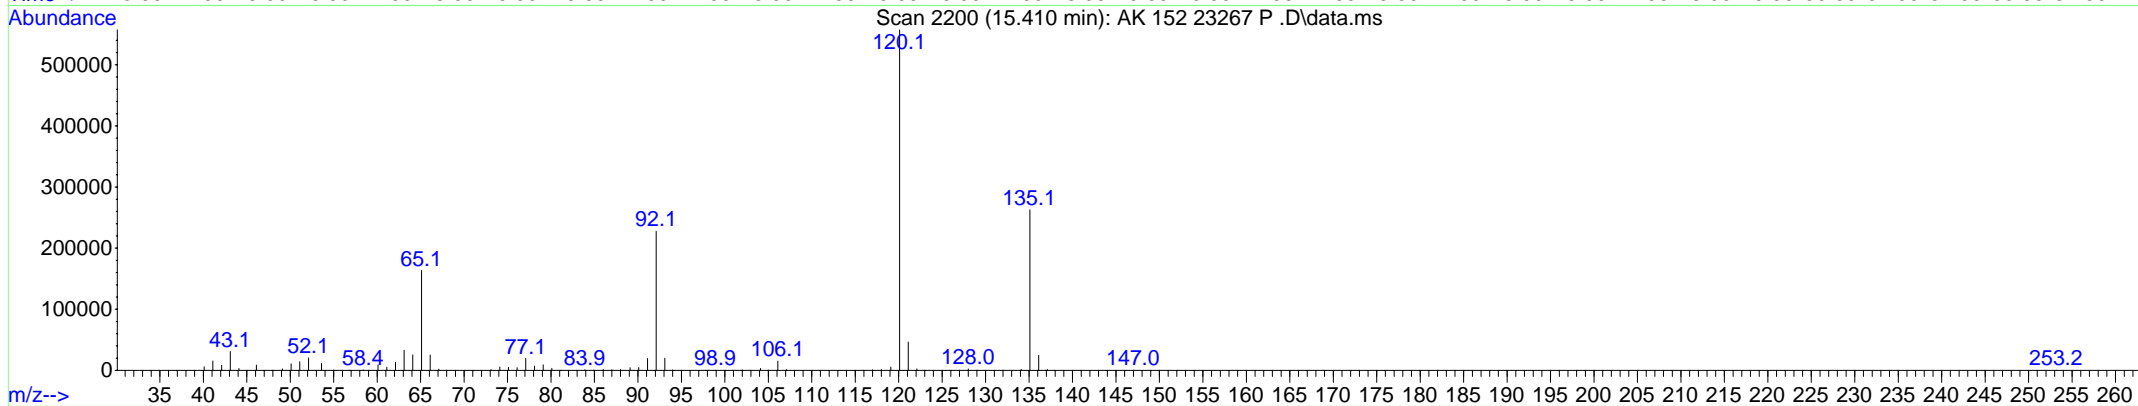

File : C:\MSD DATA\Sekvenca\20240212\AK 150 P 23061.D  
Operator :  
Acquired : 12 Feb 2024 20:25 using AcqMethod QC 5.M  
Instrument : GCMS  
Sample Name: 2c  
Misc Info :  
Vial Number: 59

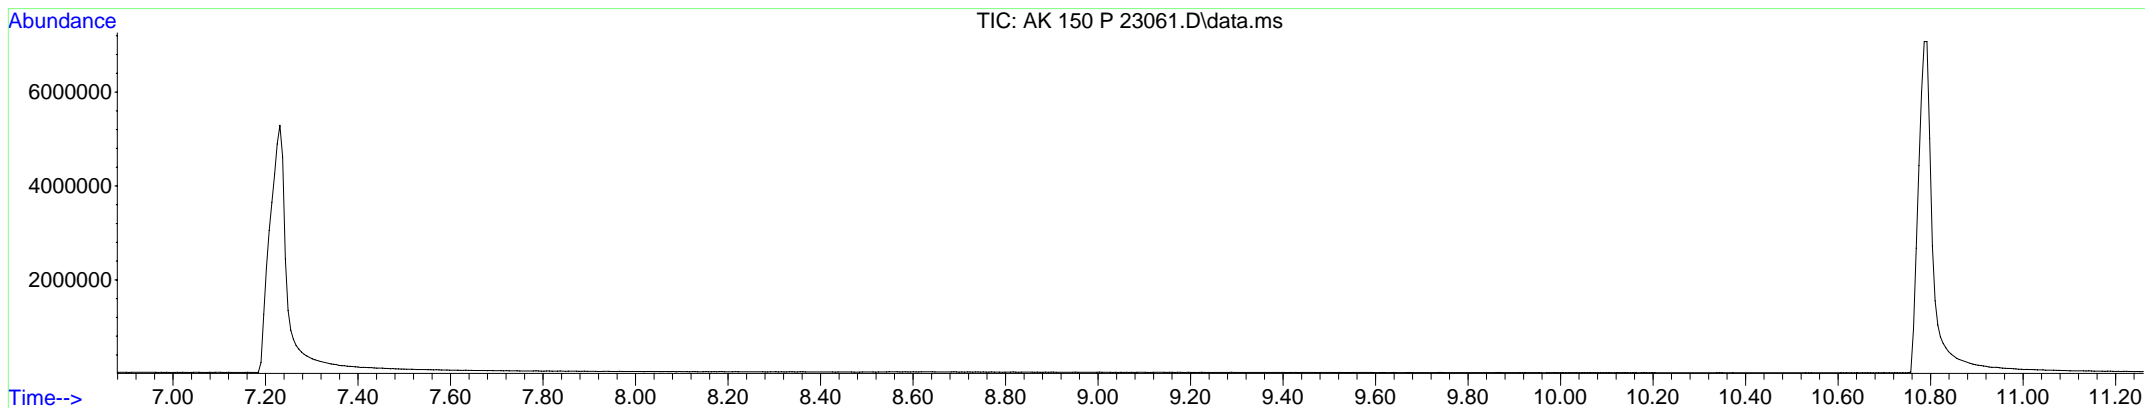

File : C:\MSD DATA\HEMIJA\IGOR OPSENICA\Kokanovic Andrija\DP084 232  
... 65 .D  
Operator :  
Instrument : GCMS  
Acquired : 27 Feb 2024 12:23 using AcqMethod QC 5 ak.M  
Sample Name: 2d  
Misc Info :

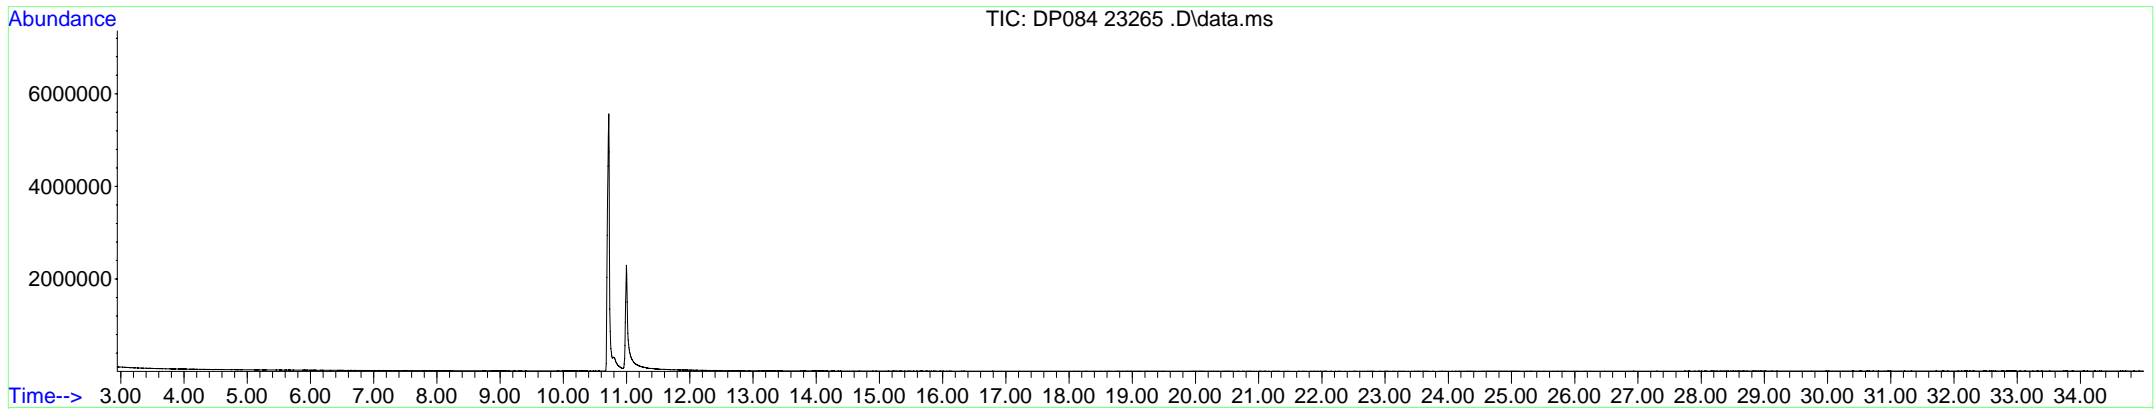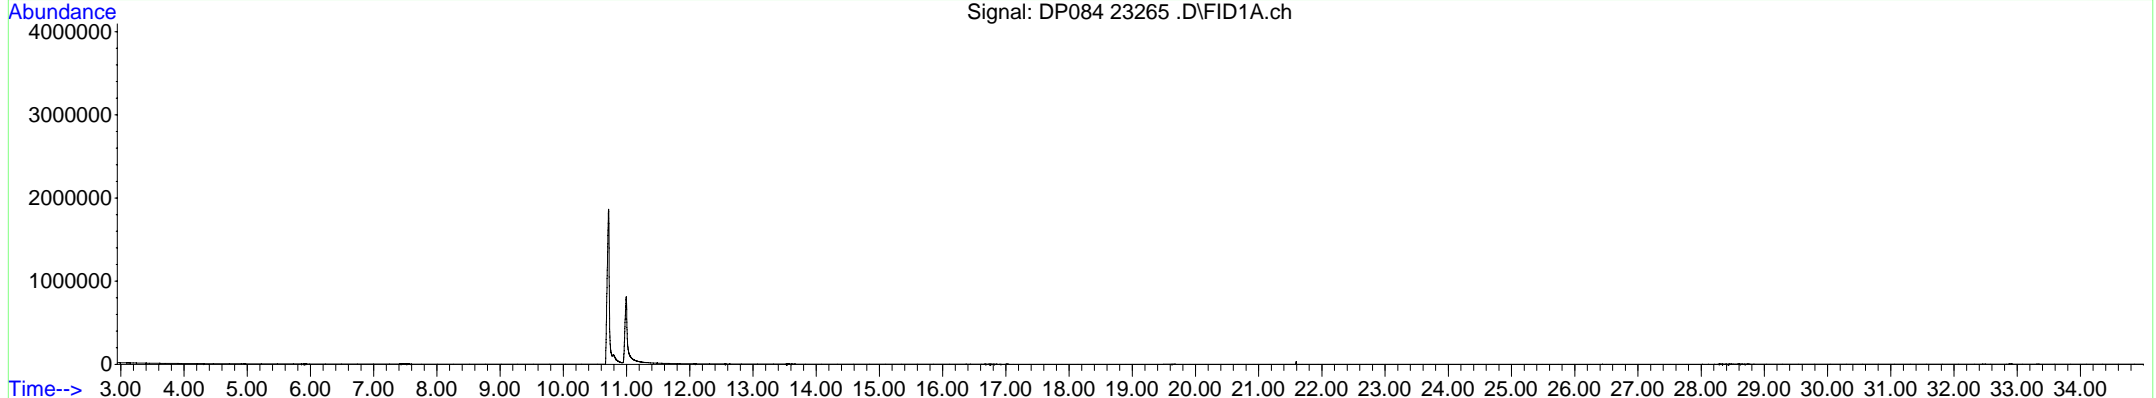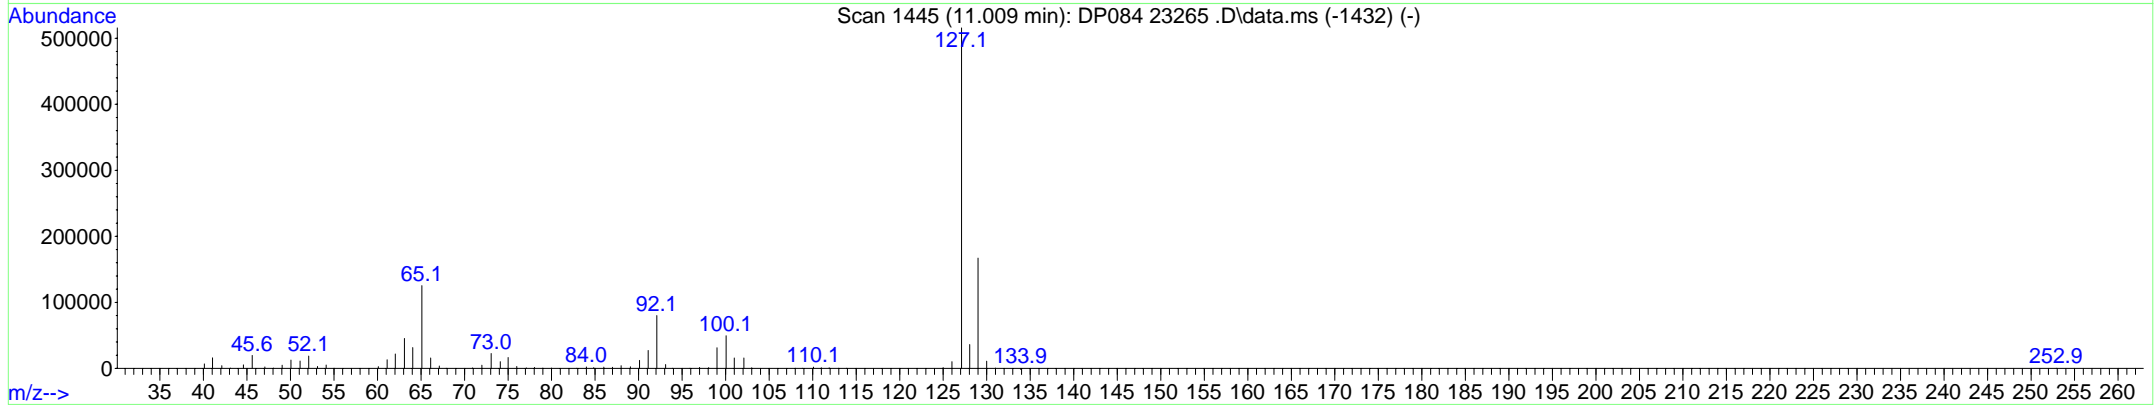

File : C:\MSD DATA\HEMIJA\IGOR OPSENICA\Kokanovic Andrija\AK 139A C  
... W.D  
Operator :  
Instrument : GCMS  
Acquired : 28 Feb 2024 12:48 using AcqMethod CW O 10.M  
Sample Name: 2e  
Misc Info :

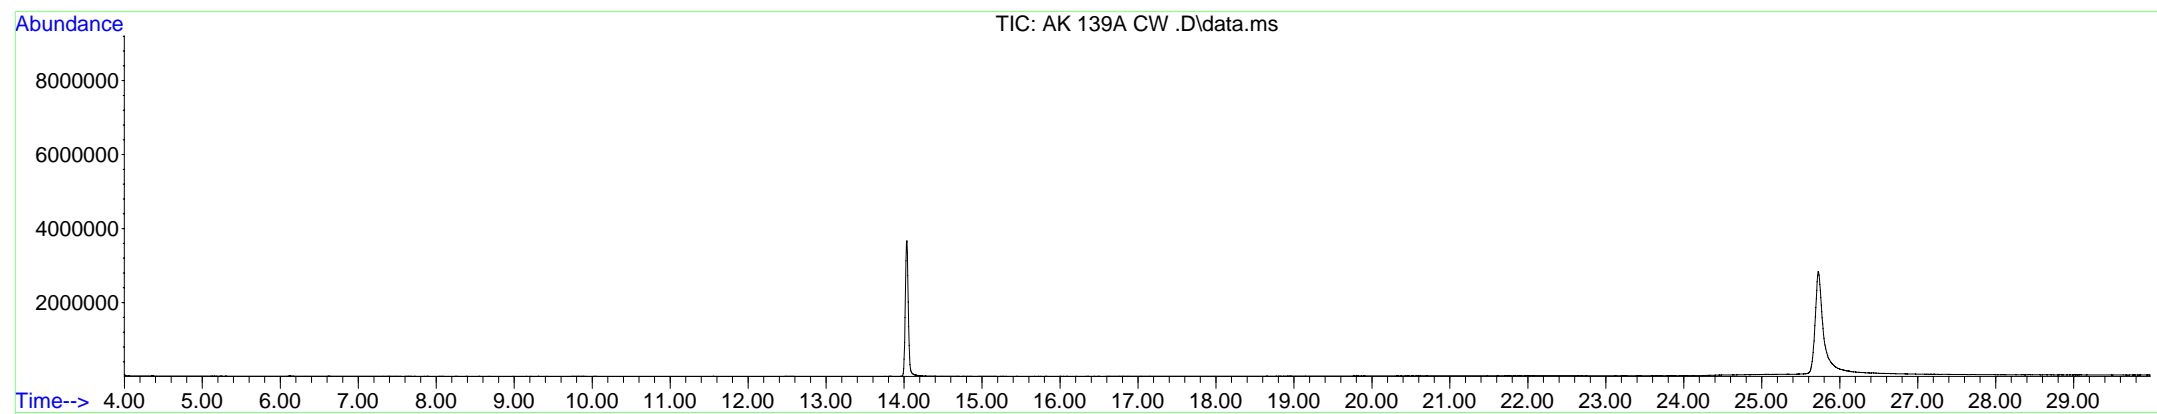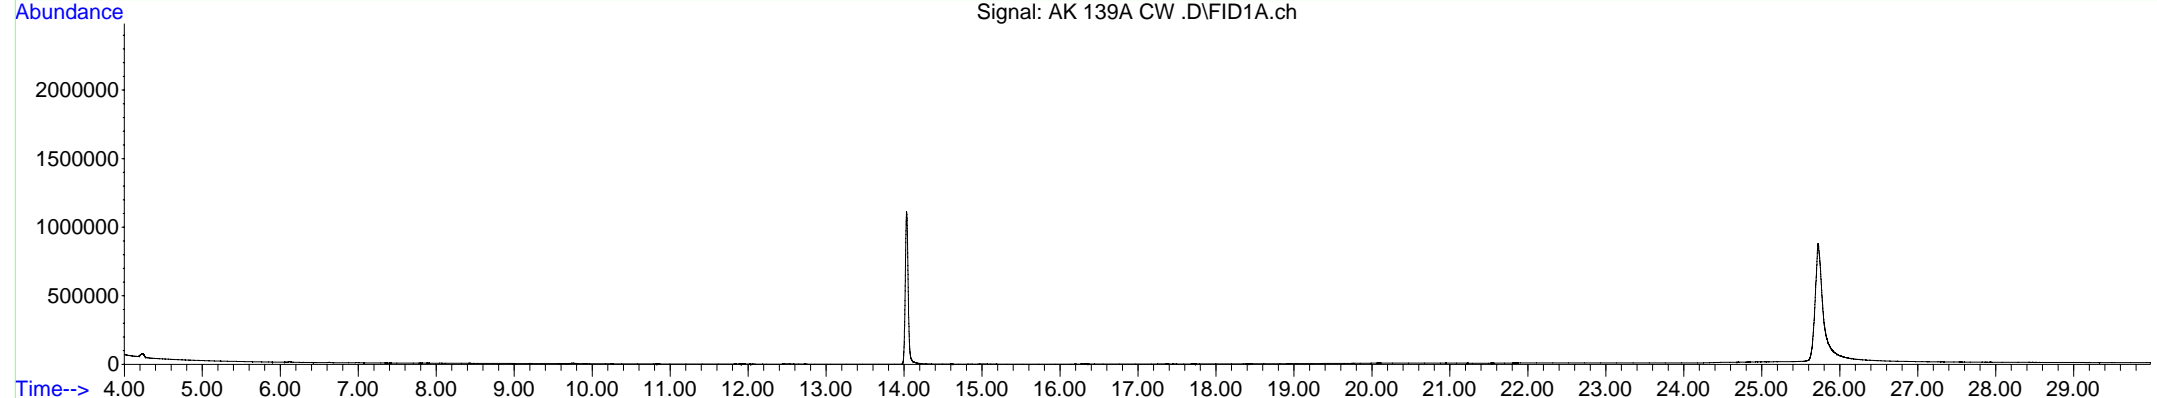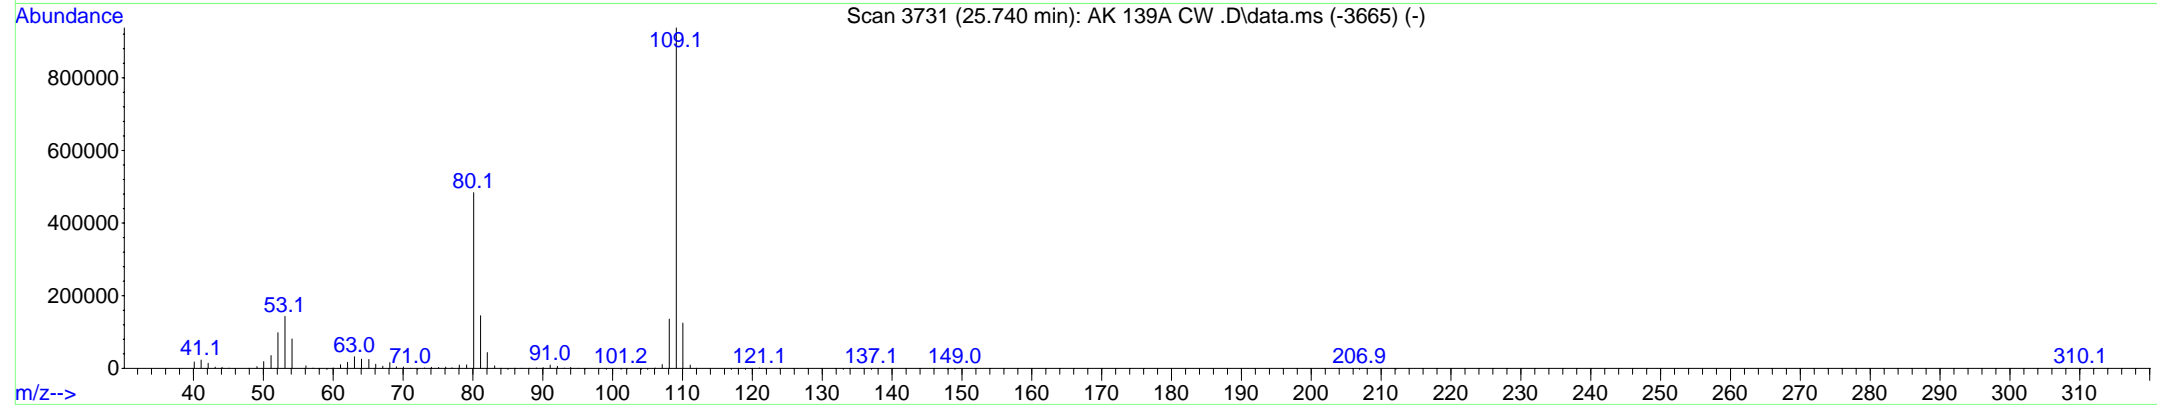

File : C:\MSD DATA\Sekvenca\20240212\AK 153 P 23064.D  
Operator :  
Acquired : 12 Feb 2024 21:08 using AcqMethod QC 5.M  
Instrument : GCMS  
Sample Name: 2c from 1f  
Misc Info :  
Vial Number: 60

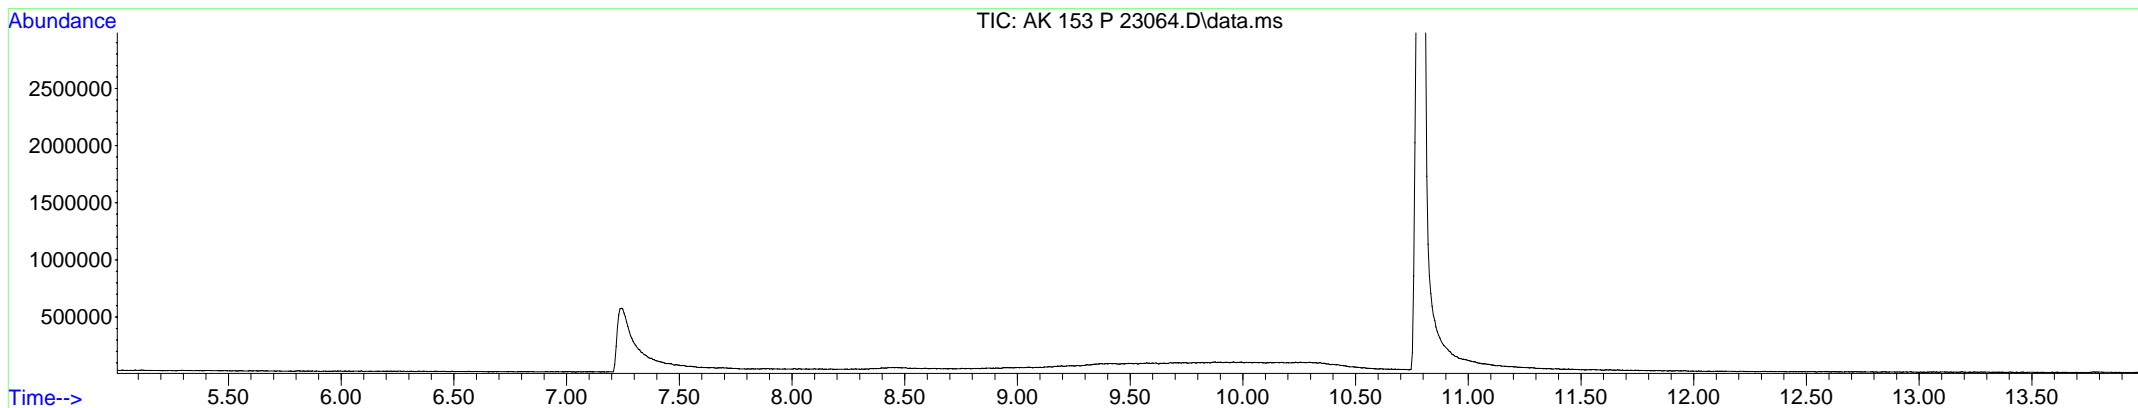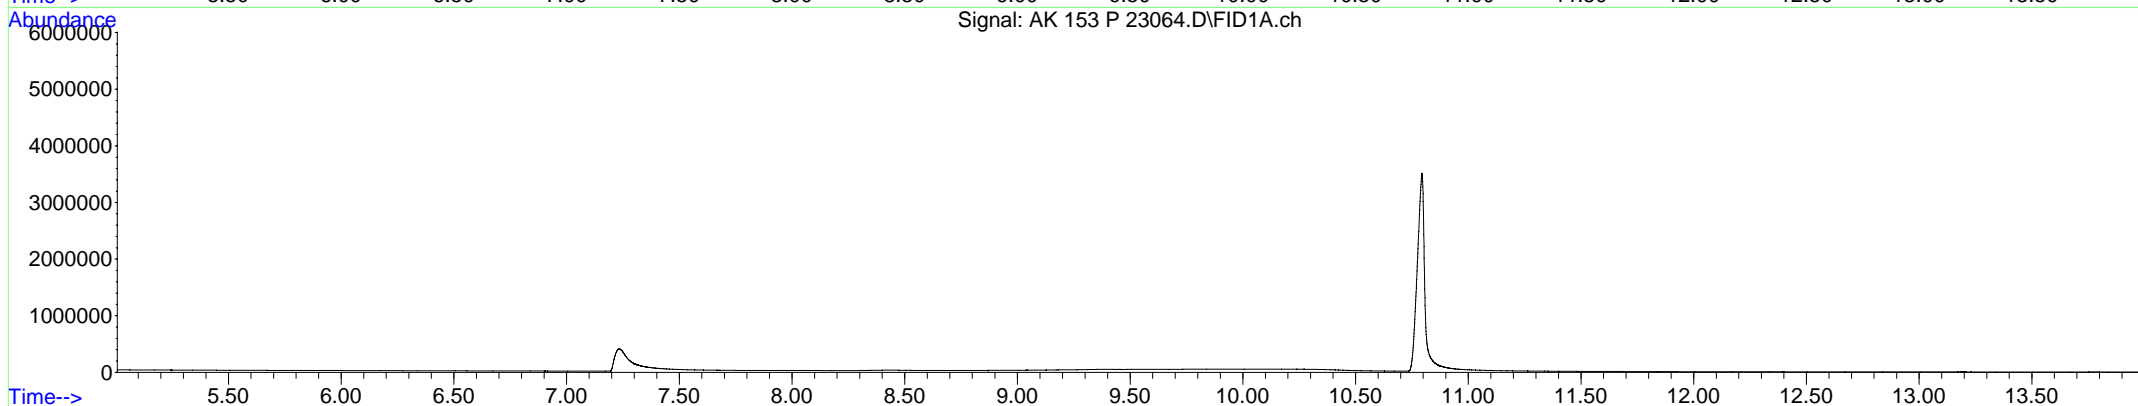

File : C:\MSD DATA\HEMIJA\IGOR OPSENICA\Kokanovic Andrija\AK 148 23  
... 296 P.D  
Operator :  
Instrument : GCMS  
Acquired : 29 Feb 2024 12:07 using AcqMethod QC 10.M  
Sample Name: 4a  
Misc Info :

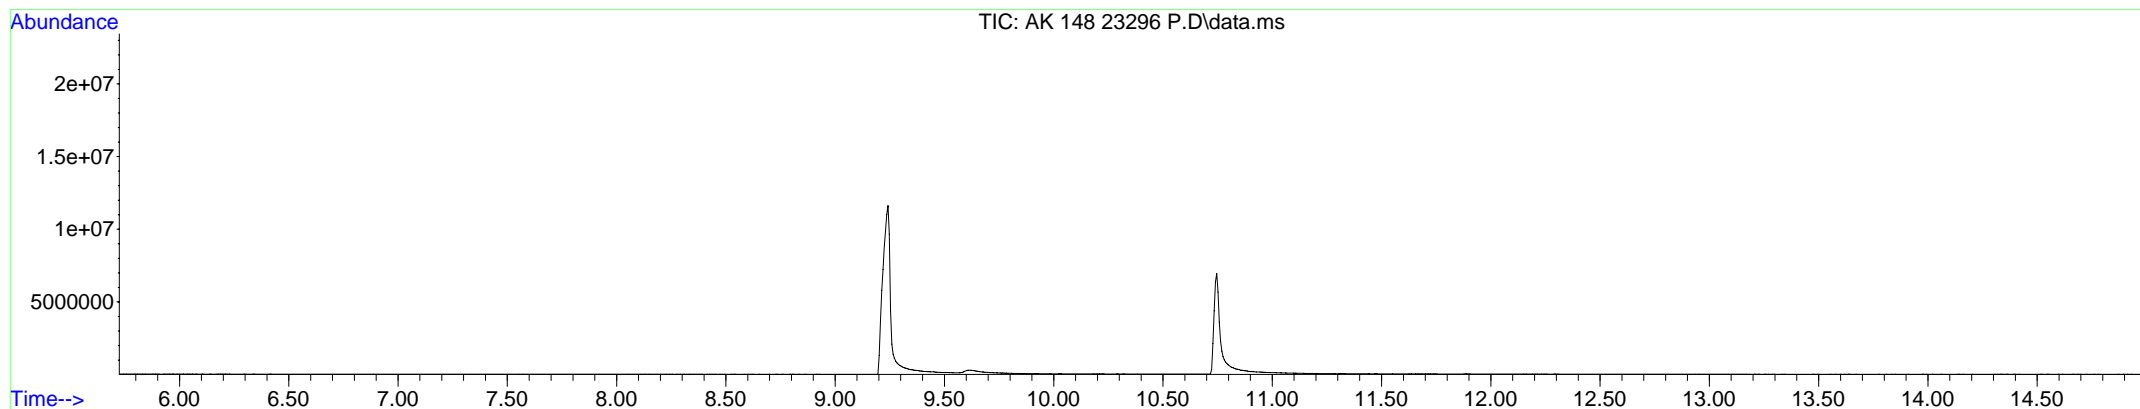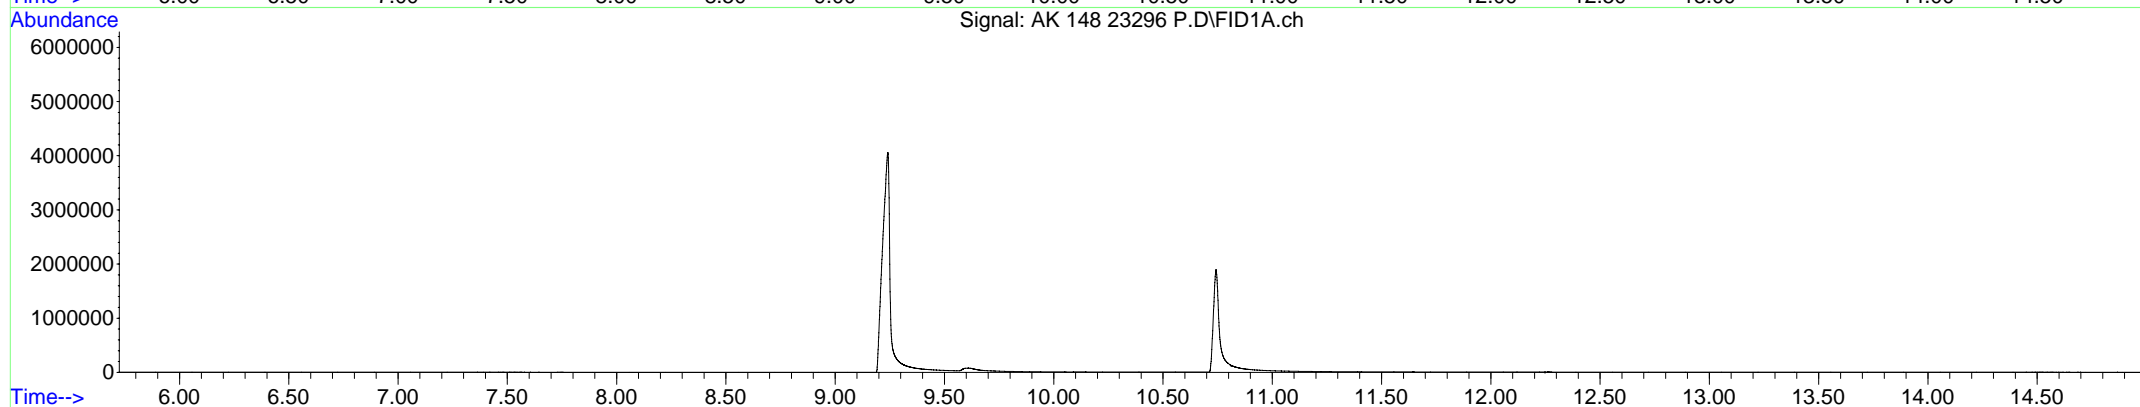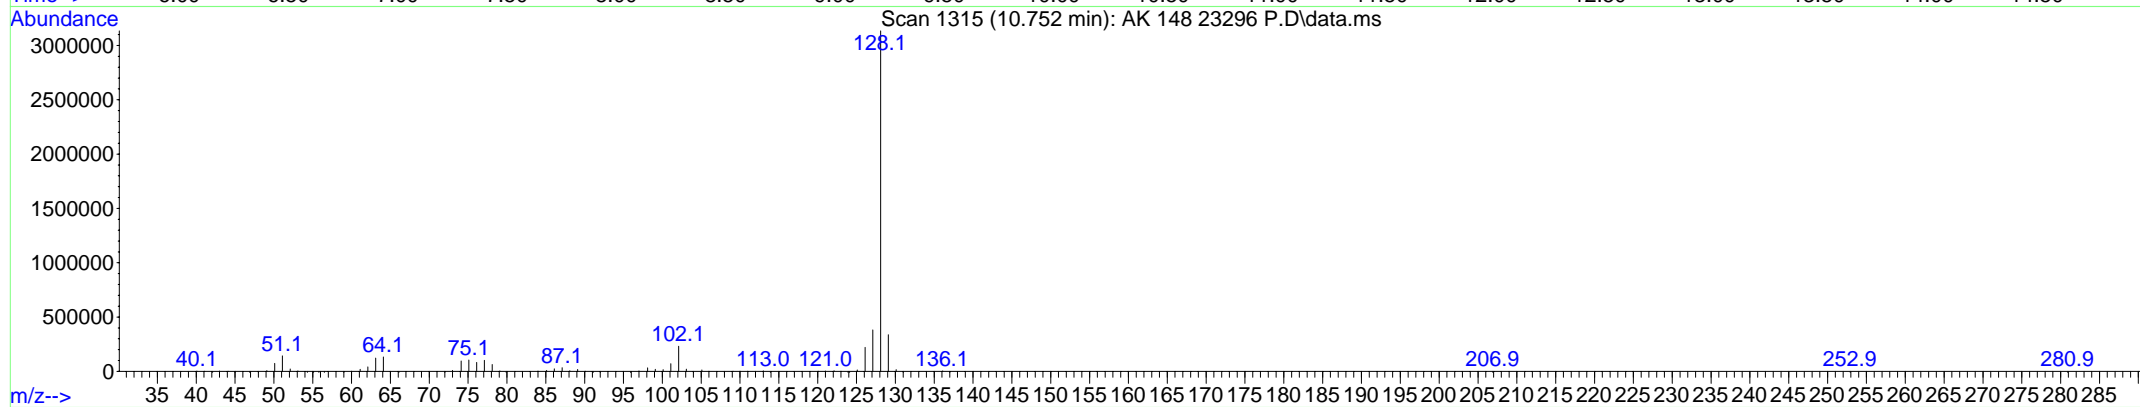



File : C:\MSD DATA\Sekvenca\20240213\23085 AK 157.D  
Operator :  
Acquired : 13 Feb 2024 17:30 using AcqMethod QC 10.M  
Instrument : GCMS  
Sample Name: 4b  
Misc Info :  
Vial Number: 27

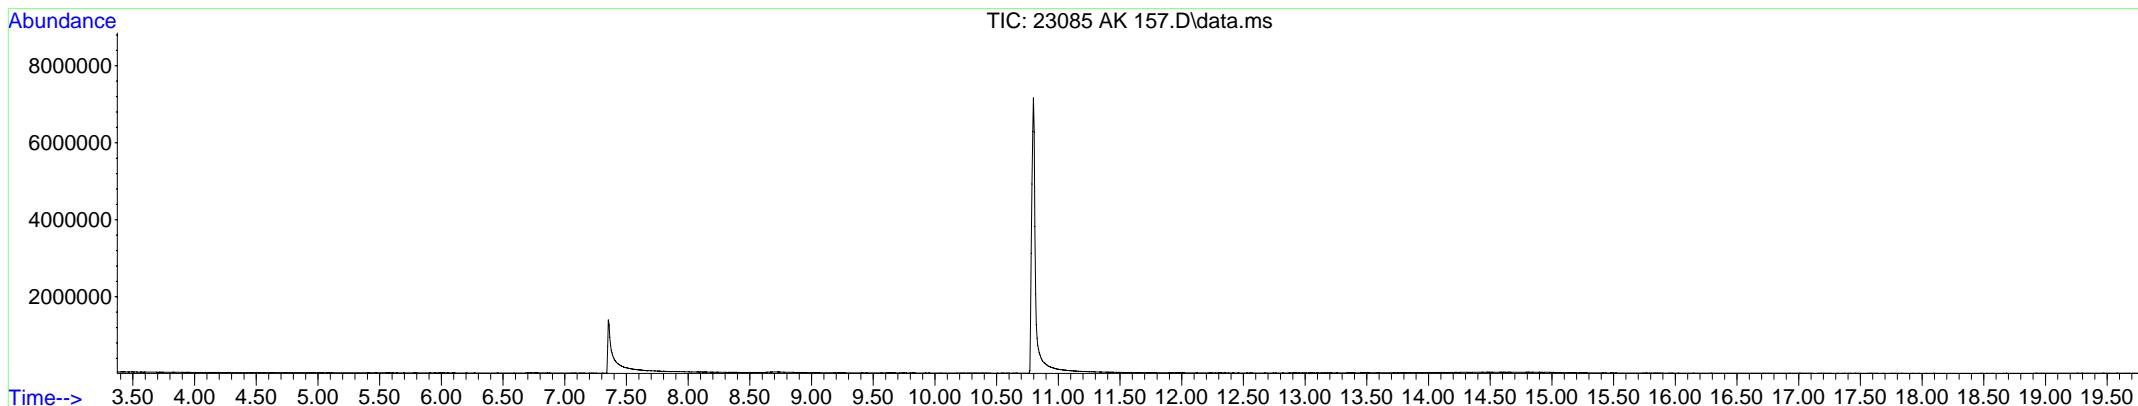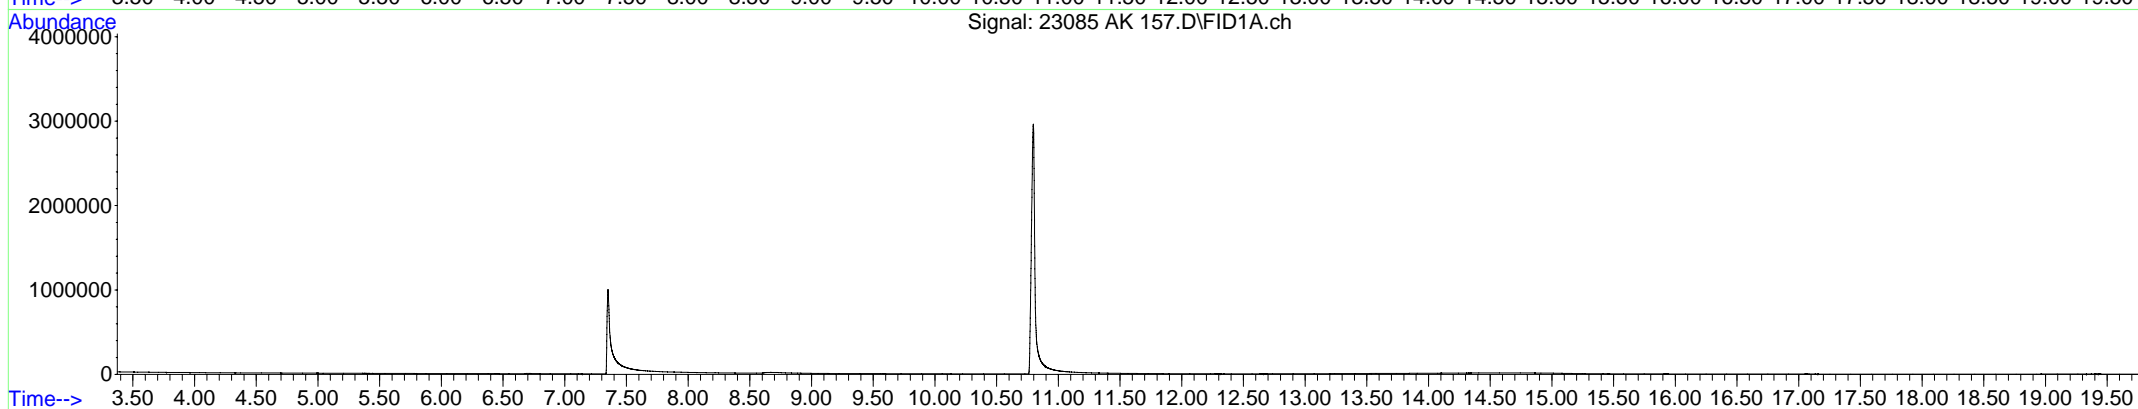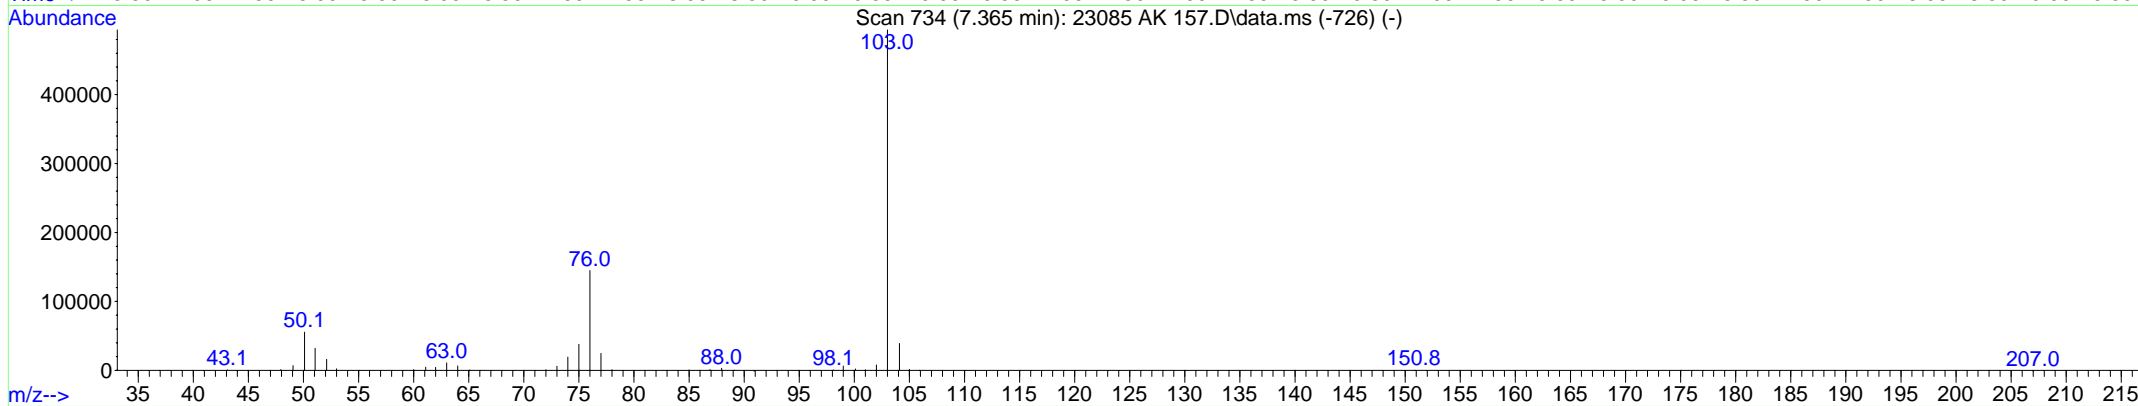

File : C:\MSD DATA\HEMIJA\IGOR OPSENICA\Kokanovic Andrija\23225 DP0  
... 81.D  
Operator :  
Instrument : GCMS  
Acquired : 23 Feb 2024 18:10 using AcqMethod QC 10.M  
Sample Name: 4c  
Misc Info :

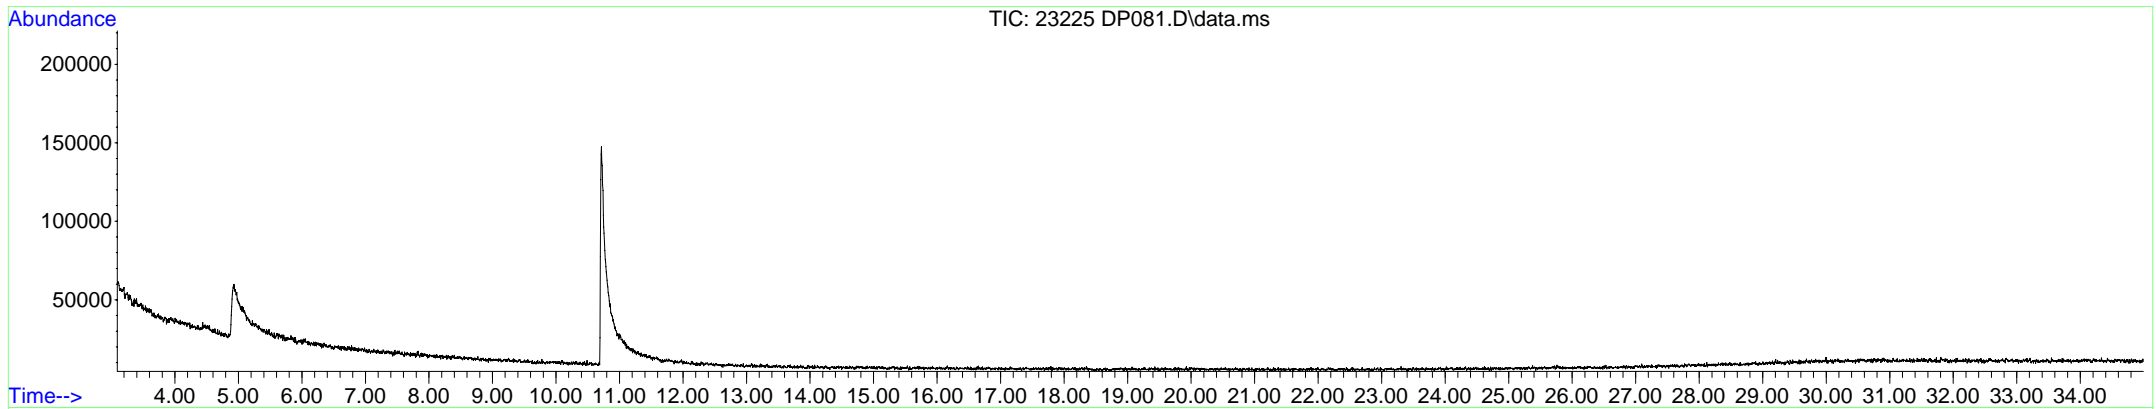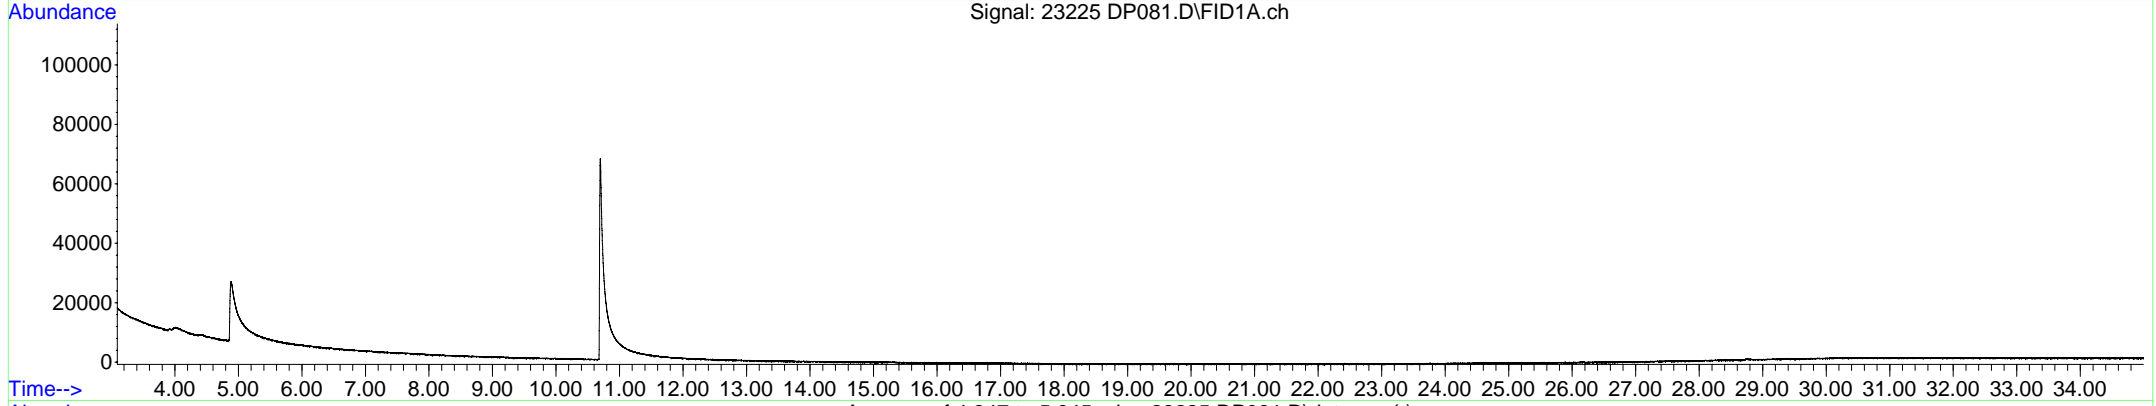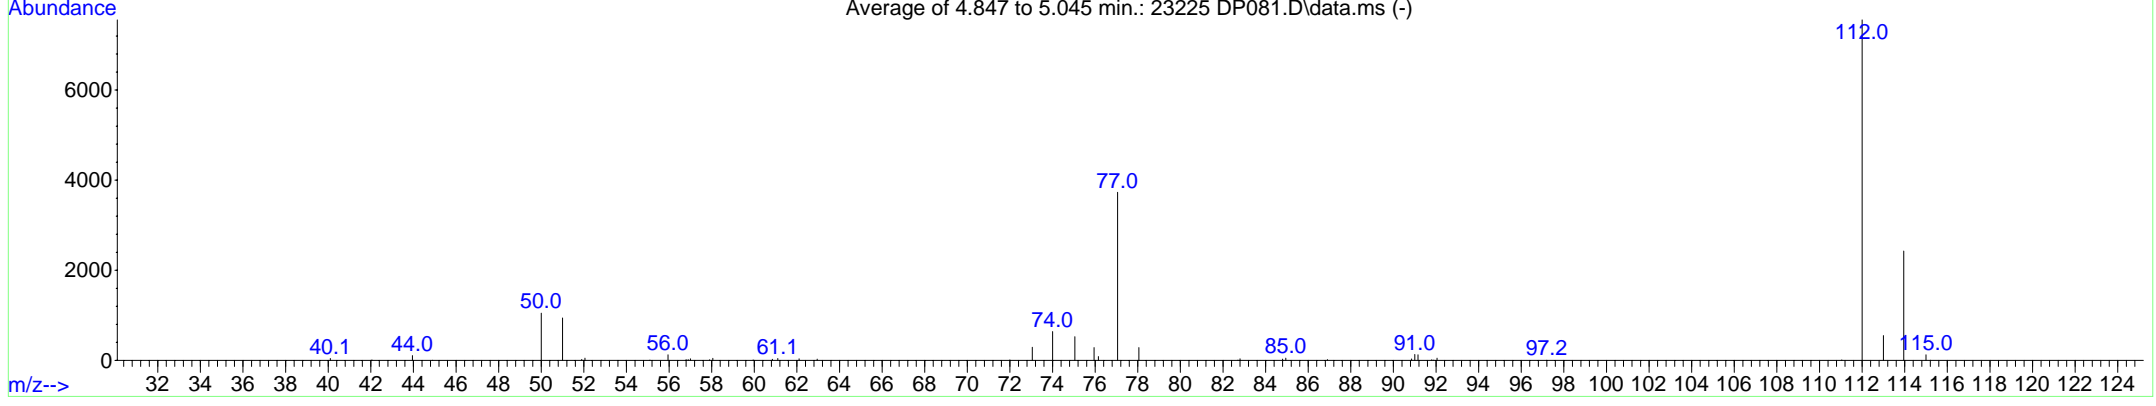

File : C:\MSD DATA\HEMIJA\IGOR OPSENICA\Kokanovic Andrija\DP 078 CW  
... .D  
Operator :  
Instrument : GCMS  
Acquired : 28 Feb 2024 12:10 using AcqMethod CW O 10.M  
Sample Name: 4d  
Misc Info :

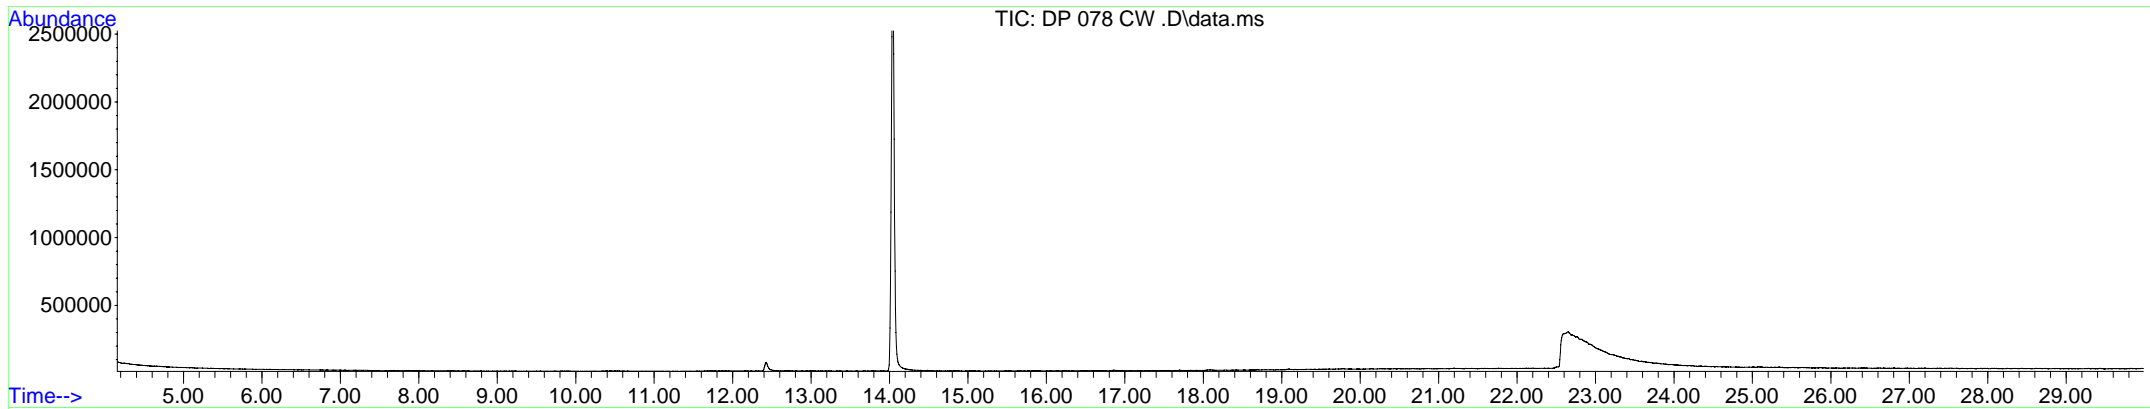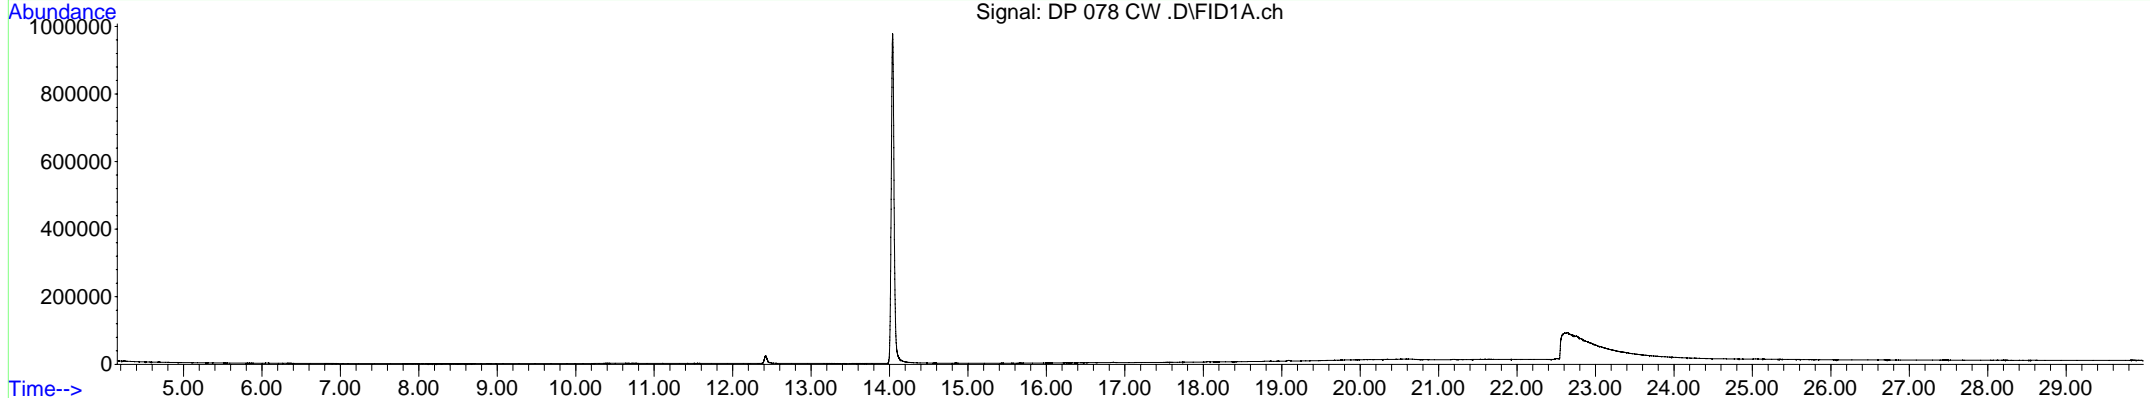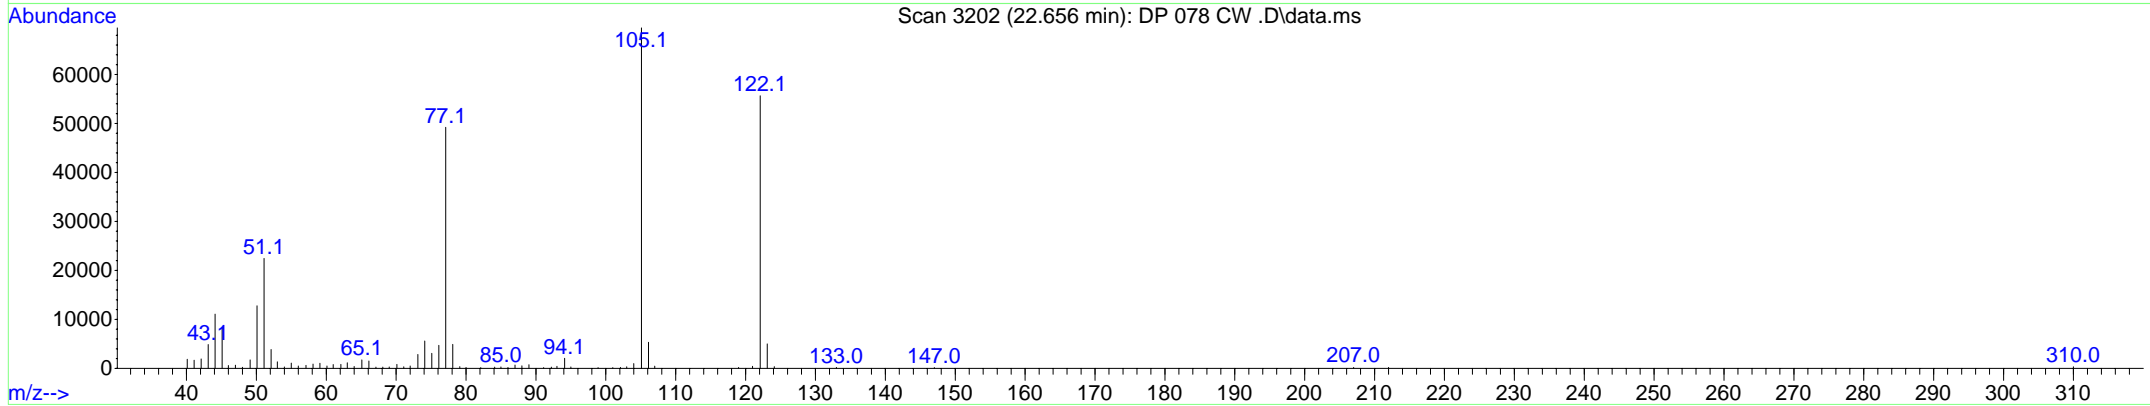

File : C:\MSD DATA\HEMIJA\IGOR OPSENICA\Kokanovic Andrija\DP 079 23  
... 165.D  
Operator :  
Instrument : GCMS  
Acquired : 21 Feb 2024 14:57 using AcqMethod QC 10.M  
Sample Name: 4e  
Misc Info :

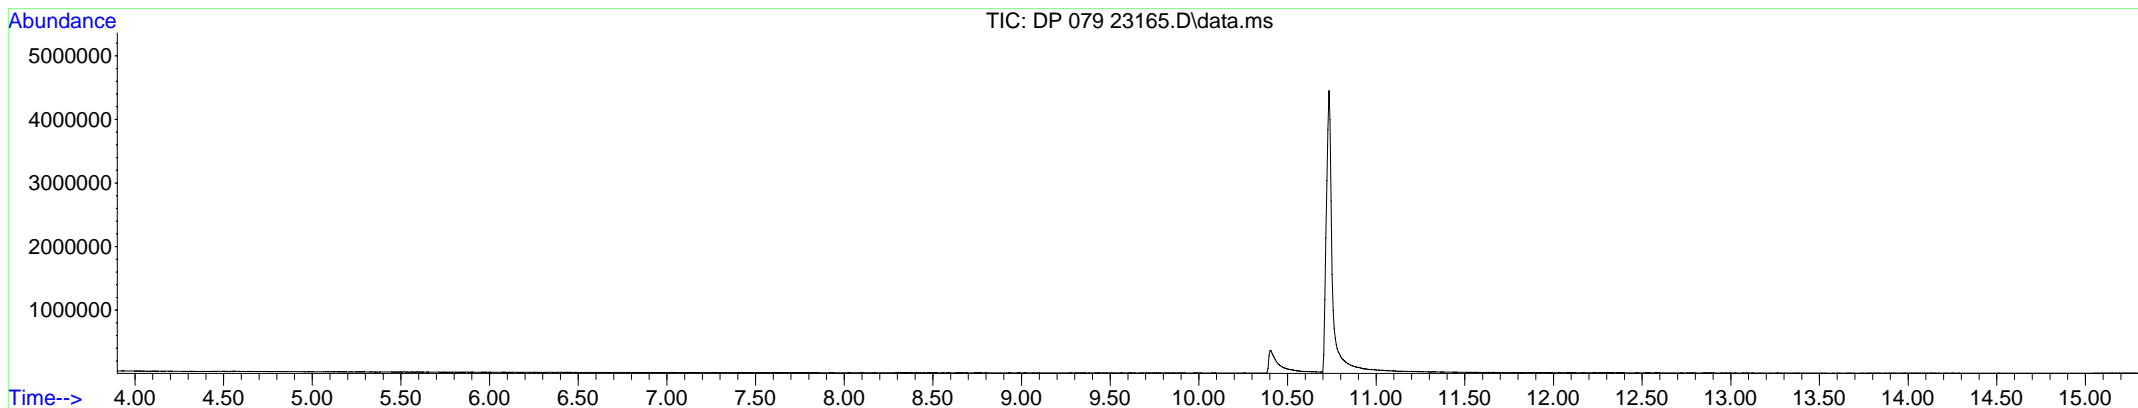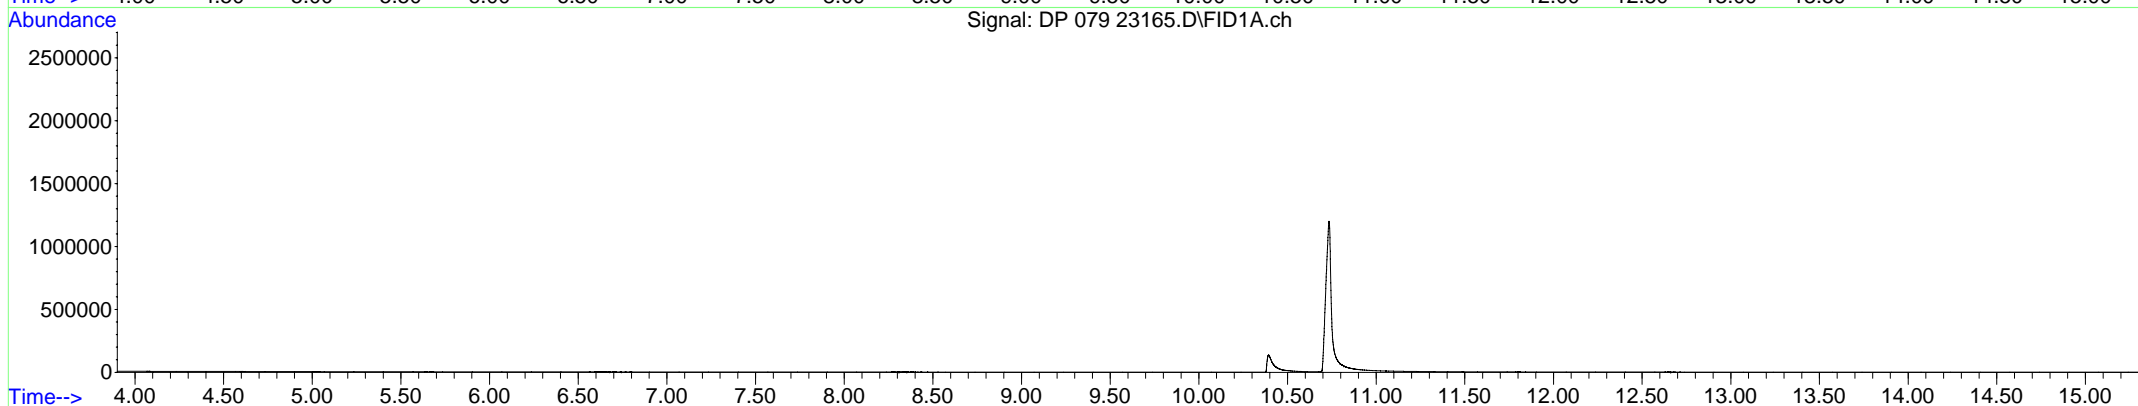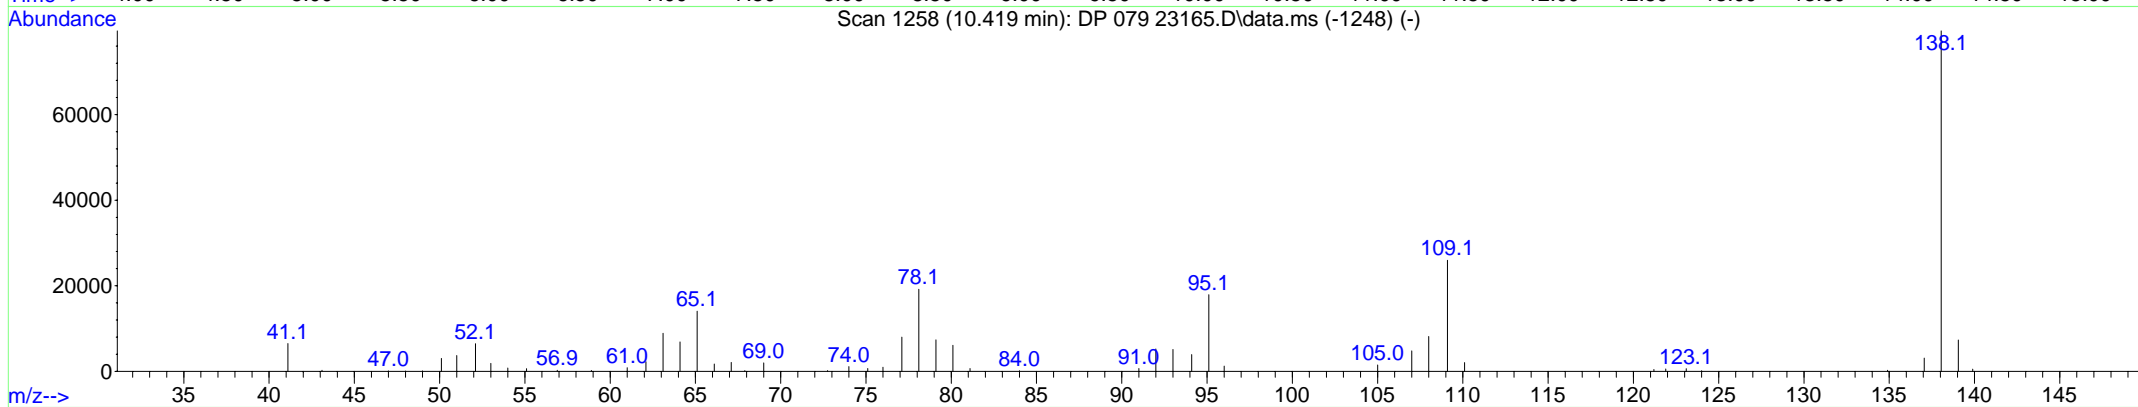

File : C:\MSD DATA\HEMIJA\IGOR OPSENICA\Kokanovic Andrija\23226 DP0  
... 83 5SP.D  
Operator :  
Instrument : GCMS  
Acquired : 27 Feb 2024 11:40 using AcqMethod QC 5 ak.M  
Sample Name: 4f  
Misc Info :

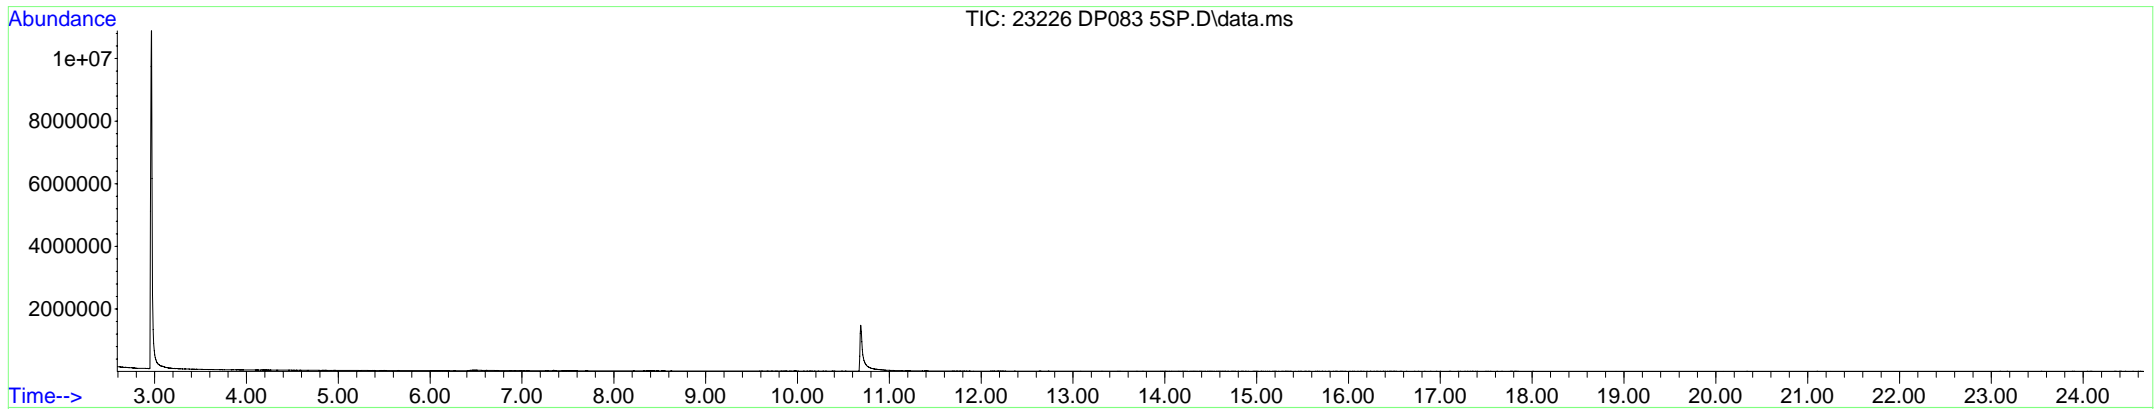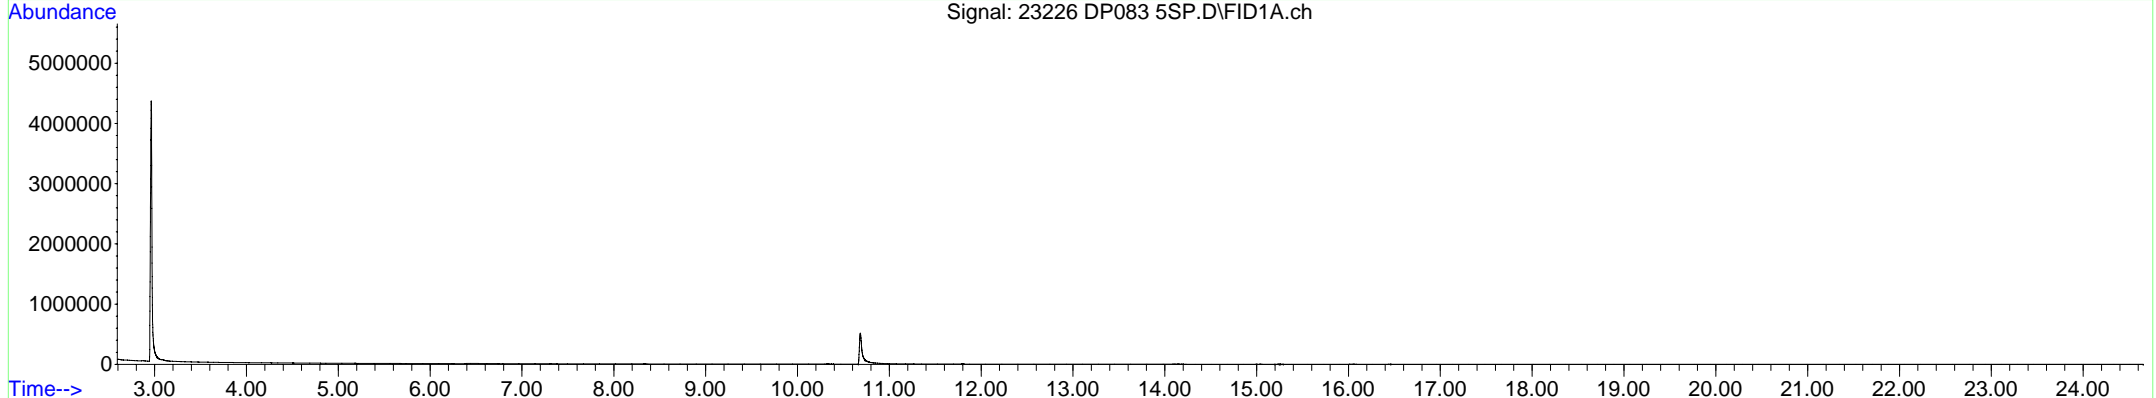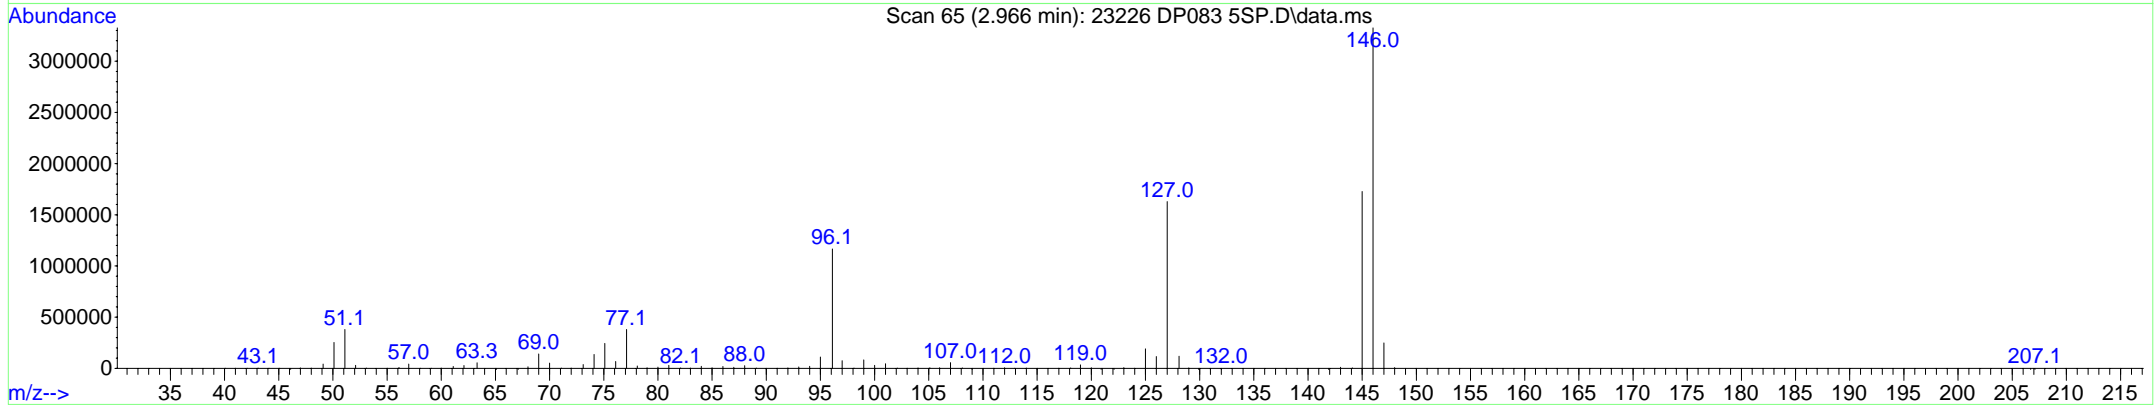

Supplement: d4cy00807c1.pdf [file d4cy00807c1.pdf]
